# Supplementary material for: Ultrasound assisted synthesis of hybrid quinoline-imidazole derivatives: a green synthetic approach
Source: Royal Society of Chemistry journal article supplement (doi:10.1039/d1ra07484a), 2021-01-01
Supplement: d1ra07484a1.pdf [file d1ra07484a1.pdf]

## SUPPORTING INFORMATION

### Ultrasound assisted synthesis of hybrid quinoline-imidazole derivatives: a green synthetic approach

Dumitrelea Diaconu<sup>b</sup>, Vasilichia Antoci<sup>a</sup>, Violeta Mangalagiu<sup>b,c</sup>, Dorina Amariuca-Mantu<sup>a</sup>, Gheorghita Zbancioc,<sup>a\*</sup> Ionel I. Mangalagiu<sup>a,b\*</sup>

<sup>a</sup>. Alexandru Ioan Cuza University of Iasi, Faculty of Chemistry, 11 Carol I Bd., 700506 Iasi, Romania

<sup>b</sup>. Alexandru Ioan Cuza University of Iasi, Institute of Interdisciplinary Research, Department of Exact and Natural Sciences – CERNESIM Center, 11 Carol I Bd., 700506 Iasi, Romania

<sup>c</sup>. Stefan cel Mare University of Suceava, Faculty of Food Engineering, Str. Universitatii 13, Suceava,, Romania

\*Corresponding author.

E-mail address: [ionelm@uaic.ro](mailto:ionelm@uaic.ro) (I.I. Mangalagiu)

[gheorghita.zbancioc@uaic.ro](mailto:gheorghita.zbancioc@uaic.ro) (Ghe. Zbancioc)

#### Table of Contents

|                                                                                                                                                                                                      |    |
|------------------------------------------------------------------------------------------------------------------------------------------------------------------------------------------------------|----|
| 1. General Information .....                                                                                                                                                                         | 1  |
| 2. General procedure for <i>N</i> -alkylation under TH and US irradiation.....                                                                                                                       | 2  |
| 3. General procedure for Huisgen 3+2 dipolar cycloaddition under TH and US irradiation .....                                                                                                         | 7  |
| 3.1. General procedure for the reaction of hybrid quinoline-imidazolium salts ( <b>3a-i</b> ) with DMAD in the presence of triethylamine in chloroform under conventional TH and US irradiation..... | 7  |
| 3.2. General procedure for the reaction of hybrid quinoline-imidazolium salts ( <b>3a-i</b> ) with DMAD in 1,2-epoxybutane under conventional TH and US irradiation.....                             | 7  |
| 3.3. General procedure for the reaction of hybrid quinoline-imidazolium salts ( <b>3a-i</b> ) with DMAD in 1,2-epoxybutane and TPCD under conventional TH and US irradiation.....                    | 8  |
| NMR Spectra of compounds .....                                                                                                                                                                       | 16 |

## 1. General Information

All the reagents and solvents were purchased from commercial sources and used without further purification. Melting points were recorded on a MEL-TEMP II apparatus in open capillary tubes and are uncorrected. Analytical thin-layer chromatography (TLC) was performed with commercial Merck silica gel 60 F<sub>254</sub> plates and visualized with UV light ( $\lambda_{\text{max}} = 254$  or 365 nm).

The NMR spectra were recorded on a Bruker Avance III 500 MHz spectrometer operating at 500 MHz for <sup>1</sup>H and 125 MHz for <sup>13</sup>C{<sup>1</sup>H}. The NMR apparatus is equipped with a 5 mm PABBO detection probe, and the program used for acquisition and processing data is *TopSpin 3.2 PL5*. The following abbreviations were used to designate chemical shift multiplicities: s = singlet, d = doublet, dd = doublet of doublet, t = triplet, m = multiplet. Chemical shifts were reported in  $\delta$  units (ppm) relative to the residual peaks of solvents (ref: DMSO, <sup>1</sup>H: 2.50 ppm; <sup>13</sup>C{<sup>1</sup>H}: 39.52 ppm or CDCl<sub>3</sub>, <sup>1</sup>H: 7.26 ppm; <sup>13</sup>C: 77.16 ppm). Coupling constants (*J*) were given in Hz. Infrared (IR) data were recorded as films on potassium bromide (KBr) pellets on a FT-IR Shimadzu Prestige 8400s spectrophotometer. The microanalyses were in satisfactory agreement with the calculated values: C,  $\pm 0.15$ ; H,  $\pm 0.10$ ; N,  $\pm 0.30$ . Ultrasound assisted reactions were accomplished using Sonics (Sonics VCX-130, USA), with a nominal power of 130W and a frequency of 20 kHz. For this ultrasonic reactor the titanium standard horn

(diameter: 6 mm; length: 116 mm) was fixed firmly to the ultrasonic converter. The titanium horn was directly immersed in the used solvent.

## 2. General procedure for *N*-alkylation under TH and US irradiation

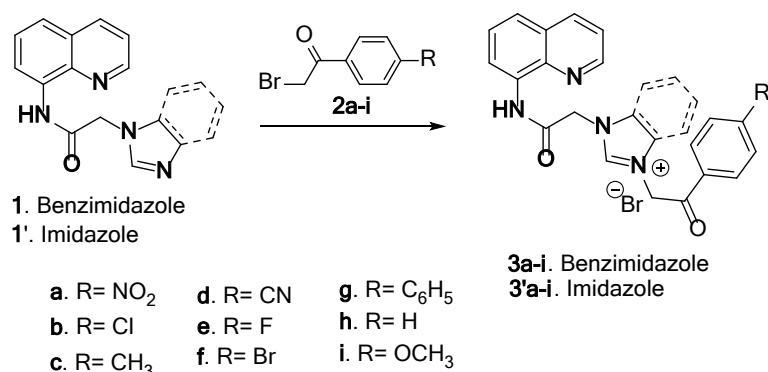

**TH:** To a solution of parental hybrid compound **1** or **1'** (1 mmol) in 12 mL acetone, corresponding phenacyl bromide **2a-i** (1.2 mmol) was gradually added. The mixture was stirred at room temperature for 48 h to 96 h (as is presented in Tabel 1). The obtained precipitate was separated by filtration and was washed with 5-7 mL of acetone. No other purification required.

**US:** The solution that contains parental hybrid compound **1** or **1'** (1 mmol) and corresponding phenacyl bromide **2a-i** (1.2 mmol) was placed in a reaction vessel and was exposed under US irradiation. The best results (see Tabel 1) were obtained applying a pulse irradiation (5 s pulse / 5 s pause, 100% from the full power of the generator). Once the irradiation cycle was completed, the reaction vessel was removed and processed as indicated for TH.

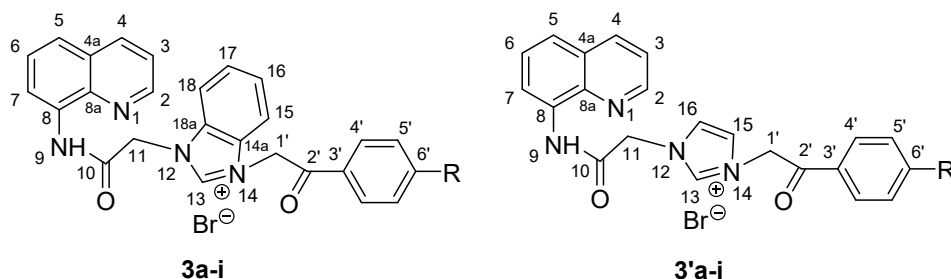

3-(2-(4-nitrophenyl)-2-oxoethyl)-1-(2-oxo-2-(quinolin-8-ylamino)ethyl)-1*H*-benzo[*d*]imidazol-3-ium bromide (**3a**)

Yellow powder (from acetone); mp 217-219 °C; IR (KBr)  $\nu/\text{cm}^{-1}$ : 3358, 3030, 2970, 1667, 1707, 1537, 1338. <sup>1</sup>H-NMR (500 MHz, DMSO-*d*6):  $\delta_{\text{ppm}}$ : 6.01 (2H: H<sub>11</sub>, s), 6.58 (2H: H<sub>1'</sub>, s), 7.61-7.58 (1H: H<sub>6</sub>, *J*= 8.0 Hz, t), 7.76-7.70 (4H: H<sub>3</sub>, H<sub>5</sub>, H<sub>16</sub>, H<sub>17</sub>, m), 8.17-8.14 (2H: H<sub>15</sub>, H<sub>18</sub>, m), 8.39-8.37 (2H: 2xH<sub>4'</sub>, *J*<sub>4',5'</sub>= 9.0 Hz, d), 8.50-8.46 (3H: 2xH<sub>5'</sub>, H<sub>4</sub>, m), 8.58-8.57 (1H: H<sub>7</sub>, *J*<sub>7,6'</sub>= 7.5 Hz, d), 9.05-9.04 (1H: H<sub>2</sub>, *J*<sub>2,3'</sub>= 5.5 Hz, *J*<sub>2,4'</sub>= 1.5 Hz, add), 9.83 (1H: H<sub>13</sub>, s), 11.04 (1H: H<sub>9</sub>, s). <sup>13</sup>C{<sup>1</sup>H}-NMR (125 MHz, DMSO-*d*6):  $\delta_{\text{ppm}}$ : 49.76 (C<sub>11</sub>), 53.90 (C<sub>1'</sub>), 113.77 (C<sub>18</sub>), 114.16 (C<sub>15</sub>), 117.44 (C<sub>7</sub>), 122.38 (C<sub>3</sub>), 122.96 (C<sub>5</sub>), 124.09 (2xC<sub>5'</sub>), 126.83 (C<sub>16</sub>), 126.91 (C<sub>6</sub>), 126.96 (C<sub>17</sub>), 128.01 (C<sub>4a</sub>), 129.94 (2xC<sub>4'</sub>), 131.42 (C<sub>18a</sub>), 131.62 (C<sub>14a</sub>), 134.05 (C<sub>8</sub>), 136.75 (C<sub>4</sub>), 138.37 (C<sub>8a</sub>), 138.51 (C<sub>3'</sub>), 144.65 (C<sub>13</sub>), 149.16 (C<sub>2</sub>), 150.60 (C<sub>6'</sub>), 164.25 (C<sub>10</sub>), 190.58 (C<sub>2'</sub>). Anal. calcd. C<sub>26</sub>H<sub>20</sub>BrN<sub>5</sub>O<sub>4</sub>: C, 57.16; H, 3.69; N, 12.82; Found: C, 57.23; H, 3.56; N, 12.68.

3-(2-(4-chlorophenyl)-2-oxoethyl)-1-(2-oxo-2-(quinolin-8-ylamino)ethyl)-1*H*-benzo[*d*]imidazol-3-ium bromide (**3b**)

White powder (from acetone); mp 208-210 °C; IR (KBr)  $\nu/\text{cm}^{-1}$ : 3331, 3024, 2999, 1685, 1529, 742;  $^1\text{H-NMR}$  (500 MHz, DMSO-*d*<sub>6</sub>):  $\delta_{\text{ppm}}$ : 6.00 (2H: H<sub>11</sub>, s), 6.51 (2H: H<sub>1'</sub>, s), 7.61-7.57 (1H: H<sub>6</sub>,  $J = 8.0$  Hz, t), 7.78-7.69 (6H: H<sub>3</sub>, H<sub>5</sub>, H<sub>16</sub>, H<sub>17</sub>, 2xH<sub>5'</sub>, m), 8.17-8.12 (4H: H<sub>15</sub>, H<sub>18</sub>, 2xH<sub>4'</sub>, m), 8.48-8.46 (1H: H<sub>4</sub>,  $J_{4,3} = 8.0$  Hz,  $J_{4,2} = 1.5$  Hz, add), 8.58-8.56 (1H: H<sub>7</sub>,  $J_{7,6} = 8.0$  Hz, d), 9.05-9.04 (1H: H<sub>2</sub>,  $J_{2,3} = 5.5$  Hz,  $J_{2,4} = 1.5$  Hz, add), 9.83 (1H: H<sub>13</sub>, s), 11.04 (1H: H<sub>9</sub>, s).  $^{13}\text{C}\{^1\text{H}\}$ -NMR (125 MHz, DMSO-*d*<sub>6</sub>):  $\delta_{\text{ppm}}$ : 49.72 (C<sub>11</sub>), 53.43 (C<sub>1'</sub>), 113.75 (C<sub>18</sub>), 114.07 (C<sub>15</sub>), 117.43 (C<sub>7</sub>), 122.37 (C<sub>3</sub>), 122.95 (C<sub>5</sub>), 126.81 (C<sub>6</sub>), 126.90 (C<sub>16</sub>, C<sub>17</sub>), 128.00 (C<sub>4a</sub>), 129.21 (2xC<sub>5'</sub>), 130.36 (2xC<sub>4'</sub>), 131.41 (C<sub>18a</sub>), 131.62 (C<sub>14a</sub>), 132.57 (C<sub>8</sub>), 134.04 (C<sub>4</sub>), 136.73 (C<sub>3'</sub>), 138.36 (C<sub>8a</sub>), 139.44 (C<sub>6'</sub>), 144.68 (C<sub>13</sub>), 149.15 (C<sub>2</sub>), 164.24 (C<sub>10</sub>), 190.34 (C<sub>2'</sub>). Anal. calcd. C<sub>26</sub>H<sub>20</sub>BrClN<sub>4</sub>O<sub>2</sub>: C, 58.28; H, 3.76; N, 10.46; Found: C, 58.37; H, 3.81; N, 10.31.

### 3-(2-oxo-2-(*p*-tolyl)ethyl)-1-(2-oxo-2-(quinolin-8-ylamino)ethyl)-1*H*-benzo[*d*]imidazol-3-ium bromide (**3c**)

White powder (from acetone); mp 187-190 °C; IR (KBr)  $\nu/\text{cm}^{-1}$ : 3278, 3038, 2970, 1740, 1670, 1541, 1230, 1170;  $^1\text{H-NMR}$  (500 MHz, DMSO-*d*<sub>6</sub>):  $\delta_{\text{ppm}}$ : 2.45 (3H: *p*-CH<sub>3</sub>, s), 5.97 (2H: H<sub>11</sub>, s), 6.46 (2H: H<sub>1'</sub>, s), 7.49-7.48 (2H: 2xH<sub>5'</sub>,  $J_{5',4'} = 8.0$  Hz, d), 7.61-7.57 (1H: H<sub>6</sub>,  $J = 8.0$  Hz, t), 7.76-7.69 (4H: H<sub>3</sub>, H<sub>5</sub>, H<sub>16</sub>, H<sub>17</sub>, m), 8.05-8.03 (2H: 2xH<sub>4'</sub>,  $J_{4',5'} = 8.5$  Hz, d), 8.09-8.08 (1H: H<sub>18</sub>,  $J_{18,17} = 7.5$  Hz, d), 8.13-8.12 (1H: H<sub>15</sub>,  $J_{15,16} = 7.5$  Hz, d), 8.48-8.46 (1H: H<sub>4</sub>,  $J_{4,3} = 8.0$  Hz,  $J_{4,2} = 1.0$  Hz, add), 8.58-8.57 (1H: H<sub>7</sub>,  $J_{7,6} = 7.5$  Hz, d), 9.04-9.03 (1H: H<sub>2</sub>,  $J_{2,3} = 5.0$  Hz,  $J_{2,4} = 1.0$  Hz, add), 9.80 (1H: H<sub>13</sub>, s), 11.04 (1H: H<sub>9</sub>, s).  $^{13}\text{C}\{^1\text{H}\}$ -NMR (125 MHz, DMSO-*d*<sub>6</sub>):  $\delta_{\text{ppm}}$ : 21.41 (*p*-CH<sub>3</sub>), 49.72 (C<sub>11</sub>), 53.23 (C<sub>1'</sub>), 113.77 (C<sub>15</sub>), 114.04 (C<sub>18</sub>), 117.49 (C<sub>7</sub>), 122.43 (C<sub>3</sub>), 123.02 (C<sub>5</sub>), 126.87 (C<sub>6</sub>), 126.96 (C<sub>16</sub>, C<sub>17</sub>), 128.05 (C<sub>4a</sub>), 128.59 (2xC<sub>4'</sub>), 129.65 (2xC<sub>5'</sub>), 131.35 (C<sub>18a</sub>), 131.46 (C<sub>14a</sub>), 131.68 (C<sub>3'</sub>), 134.07 (C<sub>8</sub>), 136.79 (C<sub>4</sub>), 138.41 (C<sub>8a</sub>), 144.77 (C<sub>13</sub>), 145.38 (C<sub>6'</sub>), 149.21 (C<sub>2</sub>), 164.28 (C<sub>10</sub>), 190.65 (C<sub>2'</sub>). Anal. calcd. C<sub>27</sub>H<sub>23</sub>BrN<sub>4</sub>O<sub>2</sub>: C, 62.92; H, 4.50; N, 10.87; Found: C, 62.82; H, 4.55; N, 10.97.

### 3-(2-(4-cyanophenyl)-2-oxoethyl)-1-(2-oxo-2-(quinolin-8-ylamino)ethyl)-1*H*-benzo[*d*]imidazol-3-ium bromide (**3d**)

White powder (from acetone); mp 195-197 °C; IR (KBr)  $\nu/\text{cm}^{-1}$ : 3317, 3005, 2901, 2236, 1712, 1537, 1228, 1067;  $^1\text{H-NMR}$  (500 MHz, DMSO-*d*<sub>6</sub>):  $\delta_{\text{ppm}}$ : 5.98 (2H: H<sub>11</sub>, s), 6.50 (2H: H<sub>1'</sub>, s), 7.61-7.57 (1H: H<sub>6</sub>,  $J = 8.0$  Hz, t), 7.76-7.70 (4H: H<sub>3</sub>, H<sub>5</sub>, H<sub>16</sub>, H<sub>17</sub>, m), 8.14-8.12 (2H: H<sub>18</sub>, H<sub>15</sub>,  $J_{15,16} = J_{18,17} = 7.5$  Hz, d), 8.18-8.17 (2H: 2xH<sub>5'</sub>,  $J_{5',4'} = 8.0$  Hz, d), 8.30-8.28 (2H: 2xH<sub>4'</sub>,  $J_{4',5'} = 8.0$  Hz, d), 8.48-8.46 (1H: H<sub>4</sub>,  $J_{4,3} = 8.0$  Hz, d), 8.57-8.56 (1H: H<sub>7</sub>,  $J_{7,6} = 7.5$  Hz, d), 9.046-9.041 (1H: H<sub>2</sub>,  $J_{2,3} = 2.5$  Hz, ad), 9.78 (1H: H<sub>13</sub>, s), 11.04 (1H: H<sub>9</sub>, s).  $^{13}\text{C}\{^1\text{H}\}$ -NMR (125 MHz, DMSO-*d*<sub>6</sub>):  $\delta_{\text{ppm}}$ : 49.76 (C<sub>11</sub>), 53.72 (C<sub>1'</sub>), 113.79 (C<sub>18</sub>), 114.12 (C<sub>15</sub>), 116.25 (C<sub>6'</sub>), 117.49 (C<sub>7</sub>), 118.09 (*p*-CN), 122.43 (C<sub>3</sub>), 123.01 (C<sub>5</sub>), 126.90 (C<sub>17</sub>), 126.96 (C<sub>6</sub>), 127.01 (C<sub>16</sub>), 128.05 (C<sub>4a</sub>), 129.09 (2xC<sub>4'</sub>), 131.45 (C<sub>18a</sub>), 131.64 (C<sub>14a</sub>), 133.09 (2xC<sub>5'</sub>), 134.07 (C<sub>8</sub>), 136.79 (C<sub>4</sub>), 137.11 (C<sub>3'</sub>), 138.40 (C<sub>8a</sub>), 144.69 (C<sub>13</sub>), 149.21 (C<sub>2</sub>), 164.27 (C<sub>10</sub>), 190.78 (C<sub>2'</sub>). Anal. calcd. C<sub>27</sub>H<sub>20</sub>BrN<sub>5</sub>O<sub>2</sub>: C, 61.61; H, 3.83; N, 13.30; Found: C, 61.56; H, 3.78; N, 13.40.

### 3-(2-(4-fluorophenyl)-2-oxoethyl)-1-(2-oxo-2-(quinolin-8-ylamino)ethyl)-1*H*-benzo[*d*]imidazol-3-ium bromide (**3e**)

White powder (from acetone); mp 208-210 °C; IR (KBr)  $\nu/\text{cm}^{-1}$ : 3329, 3001, 2901, 1703, 1686, 1535, 1233, 1079;  $^1\text{H-NMR}$  (500 MHz, DMSO-*d*<sub>6</sub>):  $\delta_{\text{ppm}}$ : 5.98 (2H: H<sub>11</sub>, s), 6.48 (2H: H<sub>1'</sub>, s), 7.55-7.51 (2H: 2xH<sub>5'</sub>,  $J_{5',4'} = 8.5$  Hz,  $J_{5',F} = 9.0$  Hz, t), 7.61-7.57 (1H: H<sub>6</sub>,  $J = 8.0$  Hz, t), 7.76-7.68 (4H: H<sub>3</sub>, H<sub>5</sub>, H<sub>16</sub>, H<sub>17</sub>, m), 8.14-8.10 (2H: H<sub>18</sub>, H<sub>15</sub>,  $J_{18,17} = J_{15,16} = 8.5$  Hz, t), 8.25-8.22 (2H: 2xH<sub>4'</sub>,  $J_{4',5'} = 8.5$  Hz,  $J_{4',F} = 5.5$  Hz, aq), 8.48-8.46 (1H: H<sub>4</sub>,  $J_{4,3} = 8.0$  Hz,  $J_{4,2} = 1.0$  Hz, dd), 8.58-8.56 (1H: H<sub>7</sub>,  $J_{7,6} = 7.5$  Hz, d), 9.04-9.03 (1H: H<sub>2</sub>,  $J_{2,3} = 5.0$  Hz,  $J_{2,4} = 1.0$  Hz, add), 9.80 (1H: H<sub>13</sub>, s), 11.04 (1H: H<sub>9</sub>, s).  $^{13}\text{C}\{^1\text{H}\}$ -NMR (125 MHz, DMSO-*d*<sub>6</sub>):  $\delta_{\text{ppm}}$ : 49.75 (C<sub>11</sub>), 53.35 (C<sub>1'</sub>), 113.78 (C<sub>18</sub>), 114.07 (C<sub>15</sub>), 116.28 (2xC<sub>5'</sub>,  $J_{C5'-F} = 21.25$  Hz, d), 117.49 (C<sub>7</sub>), 122.43 (C<sub>3</sub>), 123.01 (C<sub>5</sub>), 126.88 (C<sub>17</sub>), 126.96 (C<sub>6</sub>), 126.97 (C<sub>16</sub>), 128.05 (C<sub>4a</sub>), 130.67 (C<sub>3'</sub>,  $J_{C3'-F} = 2.50$  Hz, d), 131.45 (C<sub>14a</sub>), 131.64 (2xC<sub>4'</sub>, C<sub>18a</sub>,  $J_{C4'-F} = 7.50$  Hz, d), 134.07 (C<sub>8</sub>), 136.79 (C<sub>4</sub>), 138.41 (C<sub>8a</sub>), 144.74 (C<sub>13</sub>), 149.21 (C<sub>2</sub>), 164.28 (C<sub>10</sub>), 165.82 (C<sub>6'</sub>,  $J_{C6'-F} = 252.50$  Hz, d), 189.89 (C<sub>2'</sub>). Anal. calcd. C<sub>26</sub>H<sub>20</sub>BrFN<sub>4</sub>O<sub>2</sub>: C, 60.13; H, 3.88; N, 10.79; Found: C, 60.23; H, 3.81; N, 10.82.

3-(2-(4-bromophenyl)-2-oxoethyl)-1-(2-oxo-2-(quinolin-8-ylamino)ethyl)-1*H*-benzo[*d*]imidazol-3-ium bromide (**3f**)

White powder (from acetone); mp 235-236 °C; IR (KBr)  $\nu/\text{cm}^{-1}$ : 3300, 3020, 2970, 1732, 1700, 1530, 1229, 1170, 670;  $^1\text{H-NMR}$  (500 MHz, DMSO-*d*6):  $\delta_{\text{ppm}}$ : 5.99 (2H: H<sub>11</sub>, s), 6.49 (2H: H<sub>1'</sub>, s), 7.61-7.57 (1H: H<sub>6</sub>,  $J = 8.0$  Hz, t), 7.73-7.68 (3H: H<sub>3</sub>, H<sub>16</sub>, H<sub>17</sub>, m), 7.76-7.74 (1H: H<sub>5</sub>,  $J_{5,6} = 8.0$  Hz, d), 7.92-7.91 (2H: 2xH<sub>5'</sub>,  $J_{5',4} = 8.5$  Hz, d), 8.09-8.07 (2H: 2xH<sub>4'</sub>,  $J_{4',5} = 8.5$  Hz, d), 8.14-8.11 (2H: H<sub>15</sub>, H<sub>18</sub>,  $J_{15,16} = J_{18,17} = 7.5$  Hz, t), 8.48-8.46 (1H: H<sub>4</sub>,  $J_{4,3} = 8.5$  Hz,  $J_{4,2} = 2.0$  Hz, dd), 8.58-8.56 (1H: H<sub>7</sub>,  $J_{7,6} = 7.0$  Hz, d), 9.05-9.04 (1H: H<sub>2</sub>,  $J_{2,3} = 5.5$  Hz,  $J_{2,4} = 1.5$  Hz, dd), 9.82 (1H: H<sub>13</sub>, s), 11.04 (1H: H<sub>9</sub>, s).  $^{13}\text{C}\{^1\text{H}\}$ -NMR (125 MHz, DMSO-*d*6):  $\delta_{\text{ppm}}$ : 49.73 (C<sub>11</sub>), 53.40 (C<sub>1'</sub>), 113.75 (C<sub>18</sub>), 114.07 (C<sub>15</sub>), 117.43 (C<sub>7</sub>), 122.38 (C<sub>3</sub>), 122.95 (C<sub>5</sub>), 126.82 (C<sub>6</sub>), 126.91 (C<sub>17</sub>, C<sub>16</sub>), 128.00 (C<sub>4a</sub>), 128.72 (C<sub>6'</sub>), 130.40 (2xC<sub>4'</sub>), 131.45 (C<sub>18a</sub>), 131.62 (C<sub>14a</sub>), 132.17 (2xC<sub>5'</sub>), 132.88 (C<sub>3'</sub>), 134.04 (C<sub>8</sub>), 136.74 (C<sub>4</sub>), 138.36 (C<sub>8a</sub>), 144.68 (C<sub>13</sub>), 149.15 (C<sub>2</sub>), 164.25 (C<sub>10</sub>), 190.57 (C<sub>2'</sub>). Anal. calcd. C<sub>26</sub>H<sub>20</sub>Br<sub>2</sub>N<sub>4</sub>O<sub>2</sub>: C, 53.82; H, 3.47; N, 9.66; Found: C, 53.93; H, 3.42; N, 9.56.

3-(2-([1,1'-biphenyl]-4-yl)-2-oxoethyl)-1-(2-oxo-2-(quinolin-8-ylamino)ethyl)-1*H*-benzo[*d*]imidazol-3-ium bromide (**3g**)

White powder (from acetone); mp 205-207 °C; IR (KBr)  $\nu/\text{cm}^{-1}$ : 3309, 3001, 2915, 1688, 1529, 1203, 1073;  $^1\text{H-NMR}$  (500 MHz, DMSO-*d*6):  $\delta_{\text{ppm}}$ : 6.01 (2H: H<sub>11</sub>, s), 6.56 (2H: H<sub>1'</sub>, s), 7.49-7.48 (1H: H<sub>10'</sub>,  $J_{10',9'} = 7.5$  Hz, t), 7.57-7.54 (2H: 2xH<sub>9'</sub>,  $J_{9',10'} = 7.5$  Hz, t), 7.61-7.58 (1H: H<sub>6</sub>,  $J_{6,7} = 8.0$  Hz, t), 7.74-7.70 (3H: H<sub>3</sub>, H<sub>16</sub>, H<sub>17</sub>, m), 7.77-7.75 (1H: H<sub>5</sub>,  $J_{5,6} = 8.0$  Hz, d), 7.84-7.82 (2H: 2xH<sub>8'</sub>,  $J_{8',9} = 8.0$  Hz, d), 8.01-7.99 (2H: 2xH<sub>5'</sub>,  $J_{5',4} = 8.5$  Hz, d), 8.16-8.14 (2H: H<sub>18</sub>, H<sub>15</sub>, m), 8.25-8.23 (2H: 2xH<sub>4'</sub>,  $J_{4',5'} = 8.0$  Hz, d), 8.49-8.47 (1H: H<sub>4</sub>,  $J_{4,3} = 8.0$  Hz,  $J_{4,2} = 1.5$  Hz, add), 8.59-8.58 (1H: H<sub>7</sub>,  $J_{7,6} = 8.0$  Hz, d), 9.05-9.04 (1H: H<sub>2</sub>,  $J_{2,3} = 5.5$  Hz,  $J_{2,4} = 1.5$  Hz, add), 9.87 (1H: H<sub>13</sub>, s), 11.05 (1H: H<sub>9</sub>, s).  $^{13}\text{C}\{^1\text{H}\}$ -NMR (125 MHz, DMSO-*d*6):  $\delta_{\text{ppm}}$ : 49.73 (C<sub>11</sub>), 53.42 (C<sub>1'</sub>), 113.75 (C<sub>18</sub>), 114.07 (C<sub>15</sub>), 117.44 (C<sub>7</sub>), 122.38 (C<sub>5</sub>), 122.95 (C<sub>3</sub>), 126.82 (C<sub>6</sub>), 126.91 (C<sub>17</sub>, C<sub>16</sub>), 127.16 (2xC<sub>5'</sub>, 2xC<sub>8'</sub>), 128.01 (C<sub>4a</sub>), 128.76 (C<sub>10'</sub>), 129.21 (2xC<sub>9'</sub>, 2xC<sub>4'</sub>), 131.44 (C<sub>18a</sub>), 131.66 (C<sub>14a</sub>), 132.61 (C<sub>6'</sub>), 134.06 (C<sub>8</sub>), 136.74 (C<sub>4</sub>), 138.37 (C<sub>8a</sub>), 138.58 (C<sub>6</sub>), 144.74 (C<sub>13</sub>), 145.81 (C<sub>5'</sub>), 149.16 (C<sub>2</sub>), 164.27 (C<sub>10</sub>), 190.71 (C<sub>2'</sub>). Anal. calcd. C<sub>32</sub>H<sub>25</sub>BrN<sub>4</sub>O<sub>2</sub>: C, 66.56; H, 4.36; N, 9.70; Found: C, 66.75; H, 4.41; N, 9.60.

1-(2-oxo-2-(quinolin-8-ylamino)ethyl)-3-(2-oxo-2-phenylethyl)-1*H*-benzo[*d*]imidazol-3-ium bromide (**3h**)

White powder (from acetone); mp 203-206 °C; IR (KBr)  $\nu/\text{cm}^{-1}$ : 3290, 3040, 2969, 1698, 1680, 1575, 1220;  $^1\text{H-NMR}$  (500 MHz, DMSO-*d*6):  $\delta_{\text{ppm}}$ : 6.02 (2H: H<sub>11</sub>, s), 6.56 (2H: H<sub>1'</sub>, s), 7.60-7.57 (1H: H<sub>6</sub>,  $J = 8.0$  Hz, t), 7.76-7.66 (6H: H<sub>3</sub>, H<sub>5</sub>, H<sub>16</sub>, H<sub>17</sub>, 2xH<sub>5'</sub>, m), 7.81-7.79 (1H: H<sub>6'</sub>,  $J_{6',5'} = 7.5$  Hz, t), 8.16-8.13 (4H: H<sub>15</sub>, H<sub>18</sub>, 2xH<sub>4'</sub>, m), 8.48-8.46 (1H: H<sub>4</sub>,  $J_{4,3} = 8.0$  Hz, d), 8.58-8.56 (1H: H<sub>7</sub>,  $J_{7,6} = 7.5$  Hz, d), 9.047-9.042 (1H: H<sub>2</sub>,  $J_{2,3} = 2.5$  Hz, ad), 9.89 (1H: H<sub>13</sub>, s), 11.04 (1H: H<sub>9</sub>, s).  $^{13}\text{C}\{^1\text{H}\}$ -NMR (125 MHz, DMSO-*d*6):  $\delta_{\text{ppm}}$ : 49.73 (C<sub>11</sub>), 53.48 (C<sub>1'</sub>), 113.76 (C<sub>18</sub>), 114.10 (C<sub>15</sub>), 117.46 (C<sub>7</sub>), 122.38 (C<sub>3</sub>), 122.96 (C<sub>5</sub>), 126.81 (C<sub>6</sub>), 126.91 (C<sub>17</sub>, C<sub>16</sub>), 128.01 (C<sub>4a</sub>), 128.48 (2xC<sub>5'</sub>), 129.08 (2xC<sub>4'</sub>), 131.43 (C<sub>18a</sub>), 131.66 (C<sub>14a</sub>), 133.82 (C<sub>6'</sub>), 134.05 (C<sub>8</sub>), 134.60 (C<sub>3'</sub>), 136.74 (C<sub>4</sub>), 138.38 (C<sub>8a</sub>), 144.72 (C<sub>13</sub>), 149.17 (C<sub>2</sub>), 164.27 (C<sub>10</sub>), 191.21 (C<sub>2'</sub>). Anal. calcd. C<sub>26</sub>H<sub>21</sub>BrN<sub>4</sub>O<sub>2</sub>: C, 62.28; H, 4.22; N, 11.17; Found: C, 62.38; H, 4.27; N, 11.02.

3-(2-(4-methoxyphenyl)-2-oxoethyl)-1-(2-oxo-2-(quinolin-8-ylamino)ethyl)-1*H*-benzo[*d*]imidazol-3-ium bromide (**3i**)

White powder (from acetone); mp 224-228 °C; IR (KBr)  $\nu/\text{cm}^{-1}$ : 3412, 3005, 2974, 1680, 1602, 1550, 1246, 1176;  $^1\text{H-NMR}$  (500 MHz, DMSO-*d*6):  $\delta_{\text{ppm}}$ : 3.90 (3H: *p*-OCH<sub>3</sub>, s), 5.97 (2H: H<sub>11</sub>, s), 6.44 (2H: H<sub>1'</sub>, s), 7.21-7.19 (2H: 2xH<sub>5'</sub>,  $J_{5',4} = 8.5$  Hz, d), 7.61-7.57 (1H: H<sub>6</sub>,  $J = 8.0$  Hz, t), 7.76-7.69 (4H: H<sub>3</sub>, H<sub>5</sub>, H<sub>16</sub>, H<sub>17</sub>, m), 8.09-8.07 (1H: H<sub>18</sub>,  $J_{18,17} = 8.0$  Hz, d), 8.13-8.11 (3H: H<sub>15</sub>, 2xH<sub>4'</sub>,  $J_{4',5'} = 8.5$  Hz,  $J_{15,16} = 8.5$  Hz, d), 8.48-8.46 (1H: H<sub>4</sub>,  $J_{4,3} = 8.0$  Hz, d), 8.58-8.56 (1H: H<sub>7</sub>,  $J_{7,6} = 7.5$  Hz, d), 9.046-9.040 (1H: H<sub>2</sub>,  $J_{2,3} = 3.0$  Hz, ad), 9.81 (1H: H<sub>13</sub>, s), 11.04 (1H: H<sub>9</sub>, s).  $^{13}\text{C}\{^1\text{H}\}$ -NMR (125 MHz, DMSO-*d*6):  $\delta_{\text{ppm}}$ : 49.72 (C<sub>11</sub>), 52.99 (C<sub>1'</sub>), 55.87 (*p*-OCH<sub>3</sub>), 113.76 (C<sub>18</sub>), 114.03 (C<sub>15</sub>), 114.40 (2xC<sub>5'</sub>), 117.49 (C<sub>7</sub>), 122.43 (C<sub>3</sub>), 123.01

(C<sub>5</sub>), 126.65 (C<sub>3'</sub>), 126.85 (C<sub>6</sub>), 126.96 (C<sub>17</sub>, C<sub>16</sub>), 128.05 (C<sub>4a</sub>), 130.95 (2xC<sub>4'</sub>), 131.46 (C<sub>18a</sub>), 131.70 (C<sub>14a</sub>), 134.07 (C<sub>8</sub>), 136.79 (C<sub>4</sub>), 138.41 (C<sub>8a</sub>), 144.79 (C<sub>13</sub>), 149.21 (C<sub>2</sub>), 164.29 (C<sub>6'</sub>, C<sub>10</sub>), 189.39 (C<sub>2'</sub>). Anal. calcd. C<sub>27</sub>H<sub>23</sub>BrN<sub>4</sub>O<sub>3</sub>: C, 61.03; H, 4.36; N, 10.54; Found: C, 61.13; H, 4.30; N, 10.44.

3-(2-(4-nitrophenyl)-2-oxoethyl)-1-(2-oxo-2-(quinolin-8-ylamino)ethyl)-1*H*-imidazol-3-ium bromide (**3'a**)

Yellow powder (from acetone); mp 216-218 °C; IR (KBr) v/cm<sup>-1</sup>: 3315, 3044, 2989, 1714, 1684, 1524, 1346, 1190; <sup>1</sup>H-NMR (500 MHz, DMSO-*d*<sub>6</sub>): δ<sub>ppm</sub>: 5.63 (2H: H<sub>11</sub>, s), 6.23 (2H: H<sub>1'</sub>, s), 7.63-7.59 (1H: H<sub>6</sub>, *J* = 8.0 Hz, t), 7.70-7.68 (1H: H<sub>3</sub>, *J*<sub>3,4</sub> = 8.0 Hz, *J*<sub>3,2</sub> = 4.0 Hz, add), 7.76-7.74 (1H: H<sub>5</sub>, *J*<sub>5,6</sub> = 8.5 Hz, d), 7.79 (1H: H<sub>16</sub>, s), 7.93 (1H: H<sub>15</sub>, s), 8.32-8.30 (2H: 2xH<sub>4</sub>, *J*<sub>4,5</sub> = 8.5 Hz, d), 8.47-8.45 (3H: 2xH<sub>5'</sub>, H<sub>4</sub>, *J*<sub>5',4'</sub> = 8.5 Hz, *J*<sub>4,3</sub> = 8.5 Hz, d), 8.60-8.58 (1H: H<sub>7</sub>, *J*<sub>7,6</sub> = 8.5 Hz, d) 9.01-9.00 (1H: H<sub>2</sub>, *J*<sub>2,3</sub> = 3.0 Hz, ad), 9.22 (1H: H<sub>13</sub>, s), 10.91 (1H: H<sub>9</sub>, s). <sup>13</sup>C{<sup>1</sup>H}-NMR (125 MHz, DMSO-*d*<sub>6</sub>): δ<sub>ppm</sub>: 52.09 (C<sub>1'</sub>), 55.99 (C<sub>11</sub>), 117.51 (C<sub>7</sub>), 122.33 (C<sub>3</sub>), 122.86 (C<sub>5</sub>), 123.60 (C<sub>16</sub>), 123.81 (C<sub>15</sub>), 124.16 (2xC<sub>4'</sub>), 126.91 (C<sub>6</sub>), 128.00 (C<sub>4a</sub>), 129.66 (2xC<sub>5'</sub>), 134.09 (C<sub>8</sub>), 136.71 (C<sub>4</sub>), 138.39 (C<sub>3'</sub>), 138.41 (C<sub>8a</sub>), 138.72 (C<sub>13</sub>), 149.10 (C<sub>2</sub>), 150.56 (C<sub>6'</sub>), 164.58 (C<sub>10</sub>), 190.73 (C<sub>2'</sub>). Anal. calcd. C<sub>22</sub>H<sub>18</sub>BrN<sub>5</sub>O<sub>4</sub>: C, 53.24; H, 3.66; N, 14.11; Found: C, 53.34; H, 3.71; N, 14.01.

3-(2-(4-chlorophenyl)-2-oxoethyl)-1-(2-oxo-2-(quinolin-8-ylamino)ethyl)-1*H*-imidazol-3-ium bromide (**3'b**)

White powder (from acetone); mp 226-229 °C; IR (KBr) v/cm<sup>-1</sup>: 3320, 3010, 2970, 1670, 1530, 740; <sup>1</sup>H-NMR (500 MHz, DMSO-*d*<sub>6</sub>): δ<sub>ppm</sub>: 5.61 (2H: H<sub>11</sub>, s), 6.14 (2H: H<sub>1'</sub>, s), 7.62-7.59 (1H: H<sub>6</sub>, *J* = 8.0 Hz, t), 7.70-7.67 (1H: H<sub>3</sub>, *J*<sub>3,4</sub> = 8.0 Hz, *J*<sub>3,2</sub> = 4.0 Hz, dd), 7.77-7.73 (4H: H<sub>16</sub>, H<sub>5</sub>, 2xH<sub>5'</sub>, m), 7.91 (1H: H<sub>15</sub>, s), 8.10-8.08 (2H: 2xH<sub>4</sub>, *J*<sub>4,5</sub> = 8.5 Hz, d), 8.47-8.45 (1H: H<sub>4</sub>, *J*<sub>4,3</sub> = 8.0 Hz, *J*<sub>4,2</sub> = 1.5 Hz, add), 8.59-8.58 (1H: H<sub>7</sub>, *J*<sub>7,6</sub> = 7.5 Hz, d), 9.01-9.00 (1H: H<sub>2</sub>, *J*<sub>2,3</sub> = 4.0 Hz, *J*<sub>2,4</sub> = 1.5 Hz, add), 9.20 (1H: H<sub>13</sub>, s), 10.90 (1H: H<sub>9</sub>, s). <sup>13</sup>C{<sup>1</sup>H}-NMR (125 MHz, DMSO-*d*<sub>6</sub>): δ<sub>ppm</sub>: 52.06 (C<sub>11</sub>), 55.57 (C<sub>1'</sub>), 117.52 (C<sub>7</sub>), 122.33 (C<sub>3</sub>), 122.86 (C<sub>5</sub>), 123.62 (C<sub>15</sub>), 123.73 (C<sub>16</sub>), 126.91 (C<sub>6</sub>), 128.00 (C<sub>4a</sub>), 129.27 (2xC<sub>5'</sub>), 130.08 (2xC<sub>4'</sub>), 132.49 (C<sub>3'</sub>), 134.08 (C<sub>8</sub>), 136.71 (C<sub>4</sub>), 138.39 (C<sub>8a</sub>), 138.72 (C<sub>13</sub>), 139.38 (C<sub>6'</sub>), 149.09 (C<sub>2</sub>), 164.57 (C<sub>10</sub>), 190.48 (C<sub>2'</sub>). Anal. calcd. C<sub>22</sub>H<sub>18</sub>BrClN<sub>4</sub>O<sub>2</sub>: C, 54.40; H, 3.73; N, 11.53; Found: C, 54.47; H, 3.75; N, 11.42.

3-(2-oxo-2-(*p*-tolyl)ethyl)-1-(2-oxo-2-(quinolin-8-ylamino)ethyl)-1*H*-imidazol-3-ium bromide (**3'c**)

White powder (from acetone); mp 218-219 °C; IR (KBr) v/cm<sup>-1</sup>: 3288, 3042, 2989, 1745, 1686, 1541, 1238, 1184, 1066; <sup>1</sup>H-NMR (500 MHz, DMSO-*d*<sub>6</sub>): δ<sub>ppm</sub>: 2.42 (3H: *p*-CH<sub>3</sub>, s), 5.61 (2H: H<sub>11</sub>, s), 6.12 (2H: H<sub>1'</sub>, s), 7.45-7.44 (2H: 2xH<sub>5</sub>, *J*<sub>5,4</sub> = 7.5 Hz, d), 7.62-7.59 (1H: H<sub>6</sub>, *J* = 8.0 Hz, t), 7.70-7.67 (1H: H<sub>3</sub>, *J*<sub>3,4</sub> = 8.0 Hz, *J*<sub>3,2</sub> = 4.0 Hz, aq), 7.75-7.74 (1H: H<sub>5</sub>, *J*<sub>5,6</sub> = 8.5 Hz, d), 7.78 (1H: H<sub>16</sub>, s), 7.90 (1H: H<sub>15</sub>, s), 7.98-7.96 (2H: 2xH<sub>4</sub>, *J*<sub>4,5</sub> = 8.0 Hz, d), 8.46-8.45 (1H: H<sub>4</sub>, *J*<sub>4,3</sub> = 8.0 Hz, d), 8.59-8.58 (1H: H<sub>7</sub>, *J*<sub>7,6</sub> = 7.5 Hz, d), 9.007-9.002 (1H: H<sub>2</sub>, *J*<sub>2,3</sub> = 2.5 Hz, ad), 9.21 (1H: H<sub>13</sub>, s), 10.89 (1H: H<sub>9</sub>, s). <sup>13</sup>C{<sup>1</sup>H}-NMR (125 MHz, DMSO-*d*<sub>6</sub>): δ<sub>ppm</sub>: 21.37 (*p*-CH<sub>3</sub>), 52.06 (C<sub>11</sub>), 55.46 (C<sub>1'</sub>), 117.55 (C<sub>7</sub>), 122.37 (C<sub>3</sub>), 122.91 (C<sub>5</sub>), 123.69 (C<sub>16</sub>, C<sub>15</sub>), 126.95 (C<sub>6</sub>), 128.03 (C<sub>4a</sub>), 128.31 (2xC<sub>4'</sub>), 129.67 (2xC<sub>5'</sub>), 131.27 (C<sub>3'</sub>), 134.10 (C<sub>8</sub>), 136.75 (C<sub>4</sub>), 138.42 (C<sub>8a</sub>), 138.76 (C<sub>13</sub>), 145.24 (C<sub>6'</sub>), 149.15 (C<sub>2</sub>), 164.60 (C<sub>10</sub>), 190.81 (C<sub>2'</sub>). Anal. calcd. C<sub>23</sub>H<sub>21</sub>BrN<sub>4</sub>O<sub>2</sub>: C, 59.36; H, 4.55; N, 12.04; Found: C, 59.24; H, 4.72; N, 12.18.

3-(2-(4-cyanophenyl)-2-oxoethyl)-1-(2-oxo-2-(quinolin-8-ylamino)ethyl)-1*H*-imidazol-3-ium bromide (**3'd**)

White powder (from acetone); mp 214-215 °C; IR (KBr) v/cm<sup>-1</sup>: 3310, 3010, 2920, 2220, 1725, 1530, 1230, 1060; <sup>1</sup>H-NMR (500 MHz, DMSO-*d*<sub>6</sub>): δ<sub>ppm</sub>: 5.62 (2H: H<sub>11</sub>, s), 6.19 (2H: H<sub>1'</sub>, s), 7.62-7.59 (1H: H<sub>6</sub>, *J*<sub>6,7</sub> = 7.5 Hz, *J*<sub>6,5</sub> = 8.0 Hz, t), 7.70-7.67 (1H: H<sub>3</sub>, *J*<sub>3,4</sub> = 8.5 Hz, *J*<sub>3,2</sub> = 4.5 Hz, dd), 7.75-7.73 (1H: H<sub>5</sub>, *J*<sub>5,6</sub> = 8.0 Hz, d), 7.78 (1H: H<sub>16</sub>, s), 7.92 (1H: H<sub>15</sub>, s), 8.14-8.13 (2H: 2xH<sub>5'</sub>, *J*<sub>5',4'</sub> = 8.0 Hz, d), 8.23-8.21 (2H: 2xH<sub>4</sub>, *J*<sub>4,5</sub> = 8.5 Hz, d), 8.46-8.44 (1H: H<sub>4</sub>, *J*<sub>4,3</sub> = 8.0 Hz, d) 8.59-8.58 (1H: H<sub>7</sub>, *J*<sub>7,6</sub> = 7.5 Hz, d), 9.00-8.99 (1H: H<sub>2</sub>, *J*<sub>2,3</sub> = 4.0 Hz, ad), 9.21 (1H: H<sub>13</sub>, s), 10.90 (1H: H<sub>9</sub>, s). <sup>13</sup>C{<sup>1</sup>H}-NMR (125 MHz, DMSO-*d*<sub>6</sub>): δ<sub>ppm</sub>: 52.11 (C<sub>11</sub>), 55.92 (C<sub>1'</sub>), 116.21 (C<sub>6'</sub>), 117.57 (C<sub>7</sub>), 118.05 (*p*-CN), 122.38 (C<sub>3</sub>), 122.92 (C<sub>5</sub>), 123.63 (C<sub>16</sub>), 123.83 (C<sub>15</sub>), 126.95 (C<sub>6</sub>), 128.04 (C<sub>4a</sub>), 128.84 (2xC<sub>4'</sub>), 133.14 (2xC<sub>5'</sub>), 134.10 (C<sub>8</sub>),

136.75 (C<sub>4</sub>), 137.01 (C<sub>3'</sub>), 138.42 (C<sub>8a</sub>), 138.75 (C<sub>13</sub>), 149.15 (C<sub>2</sub>), 164.60 (C<sub>10</sub>), 190.95 (C<sub>2'</sub>). Anal. calcd. C<sub>23</sub>H<sub>18</sub>BrN<sub>5</sub>O<sub>2</sub>: C, 58.00; H, 3.81; N, 14.70; Found: C, 57.94; H, 3.75; N, 14.55.

3-(2-(4-fluorophenyl)-2-oxoethyl)-1-(2-oxo-2-(quinolin-8-ylamino)ethyl)-1*H*-imidazol-3-ium bromide (**3'e**)

White powder (from acetone); mp 226-227 °C; IR (KBr) v/cm<sup>-1</sup>: 3306, 3052, 2987, 1701, 1692, 1543, 1233, 1160; <sup>1</sup>H-NMR (500 MHz, DMSO-*d*6): δ<sub>ppm</sub>: 5.62-5.61 (2H: H<sub>11</sub>, J<sub>11,F</sub>= 6.0 Hz, d), 6.16-6.14 (2H: H<sub>1'</sub>, J<sub>1',F</sub>= 11.0 Hz, d), 7.51-7.47 (2H: 2xH<sub>5'</sub>, J<sub>5',4'</sub>= 8.5 Hz, J<sub>5',F</sub>= 9.0 Hz, td), 7.63-7.59 (1H: H<sub>6</sub>, J<sub>6,7</sub>= 7.5 Hz, J<sub>6,5</sub>= 8.0 Hz, td), 7.70-7.67 (1H: H<sub>3</sub>, J<sub>3,4</sub>= 8.0 Hz, J<sub>3,2</sub>= 4.0 Hz, aq), 7.79-7.73 (2H: H<sub>5</sub>, H<sub>16</sub>, J<sub>5,6</sub>= 8.5 Hz, J<sub>16,15</sub>= 9.0 Hz, dd), 7.91-7.90 (1H: H<sub>15</sub>, J<sub>15,16</sub>= 5.5 Hz, ad), 8.18-8.16 (2H: 2xH<sub>4'</sub>, J<sub>4',5'</sub>= 8.5 Hz, J<sub>4',F</sub>= 5.5 Hz, at), 8.46-8.44 (1H: H<sub>4</sub>, J<sub>4,3</sub>= 8.0 Hz, J<sub>4,2</sub>= 1.5 Hz, dd), 8.59-8.58 (1H: H<sub>7</sub>, J<sub>7,6</sub>= 7.5 Hz, d), 9.007-9.004 (1H: H<sub>2</sub>, J<sub>2,3</sub>= 1.5 Hz, ad), 9.22-9.20 (1H: H<sub>13</sub>, J<sub>13,F</sub>= 11.5 Hz, d), 10.89 (1H: H<sub>9</sub>, s). <sup>13</sup>C{<sup>1</sup>H}-NMR (125 MHz, DMSO-*d*6): δ<sub>ppm</sub>: 52.08 (C<sub>11</sub>), 55.55 (C<sub>1'</sub>), 116.31 (2xC<sub>5'</sub>, J<sub>C5'-F</sub>= 22.00 Hz, d), 117.55 (C<sub>7</sub>), 122.37 (C<sub>3</sub>), 122.91 (C<sub>5</sub>), 123.67 (C<sub>16</sub>), 123.74 (C<sub>15</sub>), 126.94 (C<sub>6</sub>), 128.03 (C<sub>4a</sub>), 130.58 (C<sub>3'</sub>, J<sub>C3'-F</sub>= 2.75 Hz, d), 131.36 (2xC<sub>4'</sub>, J<sub>C4'-F</sub>= 9.75 Hz, d), 134.10 (C<sub>8</sub>), 136.75 (C<sub>4</sub>), 138.42 (C<sub>8a</sub>), 138.76 (C<sub>13</sub>), 149.15 (C<sub>2</sub>), 164.60 (C<sub>10</sub>), 165.72 (C<sub>6'</sub>, J<sub>C6'-F</sub>= 252.12 Hz, d), 190.05 (C<sub>2'</sub>). Anal. calcd. C<sub>22</sub>H<sub>18</sub>BrFN<sub>4</sub>O<sub>2</sub>: C, 56.30; H, 3.87; N, 11.94; Found: C, 56.40; H, 3.92; N, 11.80.

3-(2-(4-bromophenyl)-2-oxoethyl)-1-(2-oxo-2-(quinolin-8-ylamino)ethyl)-1*H*-imidazol-3-ium bromide (**3'f**)

White powder (from acetone); mp 255-256 °C; IR (KBr) v/cm<sup>-1</sup>: 3303, 3038, 2971, 1742, 1702, 1544, 1231, 1169, 673; <sup>1</sup>H-NMR (500 MHz, DMSO-*d*6): δ<sub>ppm</sub>: 5.62 (2H: H<sub>11</sub>, s), 6.16 (2H: H<sub>1'</sub>, s), 7.63-7.60 (1H: H<sub>6</sub>, J= 8.0 Hz, t), 7.66-7.65 (2H: 2xH<sub>5'</sub>, J<sub>5',4'</sub>= 7.5 Hz, d), 7.70-7.68 (1H: H<sub>3</sub>, J<sub>3,4</sub>= 8.5 Hz, J<sub>3,2</sub>= 4.5 Hz, dd), 7.81-7.74 (2H: H<sub>16</sub>, H<sub>5</sub>, m), 7.91 (1H: H<sub>15</sub>, s), 8.09-8.07 (2H: 2xH<sub>4'</sub>, J<sub>4',5'</sub>= 7.5 Hz, d), 8.47-8.45 (1H: H<sub>4</sub>, J<sub>4,3</sub>= 8.5 Hz, J<sub>4,2</sub>= 1.5 Hz, add), 8.60-8.59 (1H: H<sub>7</sub>, J<sub>7,6</sub>= 7.5 Hz, d), 9.01-9.00 (1H: H<sub>2</sub>, J<sub>2,3</sub>= 4.0 Hz, J<sub>2,4</sub>= 1.5 Hz, add), 9.21 (1H: H<sub>13</sub>, s), 10.91 (1H: H<sub>9</sub>, s). <sup>13</sup>C{<sup>1</sup>H}-NMR (125 MHz, DMSO-*d*6): δ<sub>ppm</sub>: 52.05 (C<sub>11</sub>), 55.58 (C<sub>1'</sub>), 117.51 (C<sub>7</sub>), 122.33 (C<sub>3</sub>), 122.86 (C<sub>5</sub>), 123.65 (C<sub>15</sub>), 123.70 (C<sub>16</sub>), 126.91 (C<sub>6</sub>), 128.00 (C<sub>4a</sub>), 128.17 (2xC<sub>4'</sub>), 129.12 (2xC<sub>5'</sub>), 133.73 (C<sub>3'</sub>), 134.09 (C<sub>8</sub>), 134.53 (C<sub>6'</sub>), 136.71 (C<sub>4</sub>), 138.39 (C<sub>8a</sub>), 138.73 (C<sub>13</sub>), 149.09 (C<sub>2</sub>), 164.59 (C<sub>10</sub>), 191.33 (C<sub>2'</sub>). Anal. calcd. C<sub>22</sub>H<sub>18</sub>Br<sub>2</sub>N<sub>4</sub>O<sub>2</sub>: C, 49.84; H, 3.42; N, 10.57; Found: C, 49.78; H, 3.38; N, 10.67.

3-(2-([1,1'-biphenyl]-4-yl)-2-oxoethyl)-1-(2-oxo-2-(quinolin-8-ylamino)ethyl)-1*H*-imidazol-3-ium bromide (**3'g**)

White powder (from acetone); mp 246-248 °C; IR (KBr) v/cm<sup>-1</sup>: 3320, 3067, 2977, 1686, 1538, 1329, 1183; <sup>1</sup>H-NMR (500 MHz, DMSO-*d*6): δ<sub>ppm</sub>: 5.63 (2H: H<sub>11</sub>, s), 6.21 (2H: H<sub>1'</sub>, s), 7.48-7.46 (1H: H<sub>10'</sub>, J<sub>10',9'</sub>= 7.0 Hz, t), 7.55-7.52 (2H: 2xH<sub>9'</sub>, J<sub>9',10'</sub>= 7.5 Hz, t), 7.63-7.60 (1H: H<sub>6</sub>, J= 8.0 Hz, t), 7.70-7.68 (1H: H<sub>3</sub>, J<sub>3,4</sub>= 8.0 Hz, J<sub>3,2</sub>= 4.0 Hz, dd), 7.76-7.74 (1H: H<sub>5</sub>, J<sub>5,6</sub>= 8.0 Hz, d), 7.82-7.80 (3H: 2xH<sub>8'</sub>, H<sub>16</sub>, m), 7.93 (1H: H<sub>15</sub>, s), 7.97-7.96 (2H: 2xH<sub>5'</sub>, J<sub>5',4'</sub>= 8.0 Hz, d), 8.17-8.15 (2H: 2xH<sub>4'</sub>, J<sub>4',5'</sub>= 8.0 Hz, d), 8.47-8.45 (1H: H<sub>4</sub>, J<sub>4,3</sub>= 8.0 Hz, J<sub>4,2</sub>= 1.0 Hz add), 8.61-8.59 (1H: H<sub>7</sub>, J<sub>7,6</sub>= 7.5 Hz, d), 9.01-9.00 (1H: H<sub>2</sub>, J<sub>2,3</sub>= 3.0 Hz, J<sub>2,4</sub>= 1.0 Hz, add), 9.24 (1H: H<sub>13</sub>, s), 10.92 (1H: H<sub>9</sub>, s). <sup>13</sup>C{<sup>1</sup>H}-NMR (125 MHz, DMSO-*d*6): δ<sub>ppm</sub>: 52.06 (C<sub>11</sub>), 55.58 (C<sub>1'</sub>), 117.51 (C<sub>7</sub>), 122.33 (C<sub>3</sub>), 122.86 (C<sub>5</sub>), 123.66 (C<sub>15</sub>), 123.71 (C<sub>16</sub>), 126.91 (C<sub>6</sub>), 127.10 (2xC<sub>5'</sub>), 127.18 (2xC<sub>8'</sub>), 128.00 (C<sub>4a</sub>), 128.74 (C<sub>10'</sub>), 128.93 (2xC<sub>9'</sub>), 129.19 (2xC<sub>4'</sub>), 132.54 (C<sub>7</sub>), 134.09 (C<sub>8</sub>), 136.71 (C<sub>4</sub>), 138.39 (C<sub>8a</sub>), 138.52 (C<sub>3'</sub>), 138.75 (C<sub>13</sub>), 145.69 (C<sub>6'</sub>), 149.09 (C<sub>2</sub>), 164.60 (C<sub>10</sub>), 190.87 (C<sub>2'</sub>). Anal. calcd. C<sub>28</sub>H<sub>23</sub>BrN<sub>4</sub>O<sub>2</sub>: C, 63.76; H, 4.40; N, 10.62; Found: C, 63.86; H, 4.45; N, 10.47.

1-(2-oxo-2-(quinolin-8-ylamino)ethyl)-3-(2-oxo-2-phenylethyl)-1*H*-imidazol-3-ium bromide (**3'h**)

White powder (from acetone); mp 246-248 °C; IR (KBr) v/cm<sup>-1</sup>: 3292, 3045, 2973, 1695, 1684, 1585, 1540, 1231, 1190; <sup>1</sup>H-NMR (500 MHz, DMSO-*d*6): δ<sub>ppm</sub>: 5.61 (2H: H<sub>11</sub>, s), 6.13 (2H: H<sub>1'</sub>, s), 7.63-7.59 (1H: H<sub>6</sub>, J= 8.0 Hz, t), 7.70-7.68 (1H: H<sub>3</sub>, J<sub>3,4</sub>= 8.5 Hz, J<sub>3,2</sub>= 4.0 Hz, dd), 7.78-7.74 (2H: H<sub>5</sub>, H<sub>16</sub>, m), 7.90-7.87 (4H: H<sub>6'</sub>, 2xH<sub>5'</sub>, H<sub>15</sub>, m), 8.01-8.00 (2H: 2xH<sub>4'</sub>, J<sub>4',5'</sub>= 8.0 Hz, d), 8.47-8.45 (1H: H<sub>4</sub>, J<sub>4,3</sub>= 8.0

Hz, d) 8.60-8.58 (1H: H<sub>7</sub>,  $J_{7,6}$  = 8.0 Hz, d), 9.01-9.00 (1H: H<sub>2</sub>,  $J_{2,3}$  = 4.0 Hz, ad), 9.18 (1H: H<sub>13</sub>, s), 10.91 (1H: H<sub>9</sub>, s). <sup>13</sup>C{<sup>1</sup>H}-NMR (125 MHz, DMSO-*d*<sub>6</sub>):  $\delta_{\text{ppm}}$ : 52.06 (C<sub>11</sub>), 55.53 (C<sub>1'</sub>), 117.51 (C<sub>7</sub>), 122.33 (C<sub>3</sub>), 122.86 (C<sub>5</sub>), 123.61 (C<sub>16</sub>), 123.74 (C<sub>15</sub>), 126.91 (C<sub>6</sub>), 128.00 (C<sub>4a</sub>), 128.65 (C<sub>3'</sub>), 130.11 (2xC<sub>4'</sub>), 132.22 (2xC<sub>5'</sub>), 132.80 (C<sub>6'</sub>), 134.09 (C<sub>8</sub>), 136.71 (C<sub>4</sub>), 138.39 (C<sub>8a</sub>), 138.72 (C<sub>13</sub>), 149.09 (C<sub>2</sub>), 164.58 (C<sub>10</sub>), 190.70 (C<sub>2'</sub>). Anal. calcd. C<sub>22</sub>H<sub>19</sub>BrN<sub>4</sub>O<sub>2</sub>: C, 58.55; H, 4.24; N, 12.41; Found: C, 58.65; H, 4.29; N, 12.25.

### 3. General procedure for Huisgen 3+2 dipolar cycloaddition under TH and US irradiation

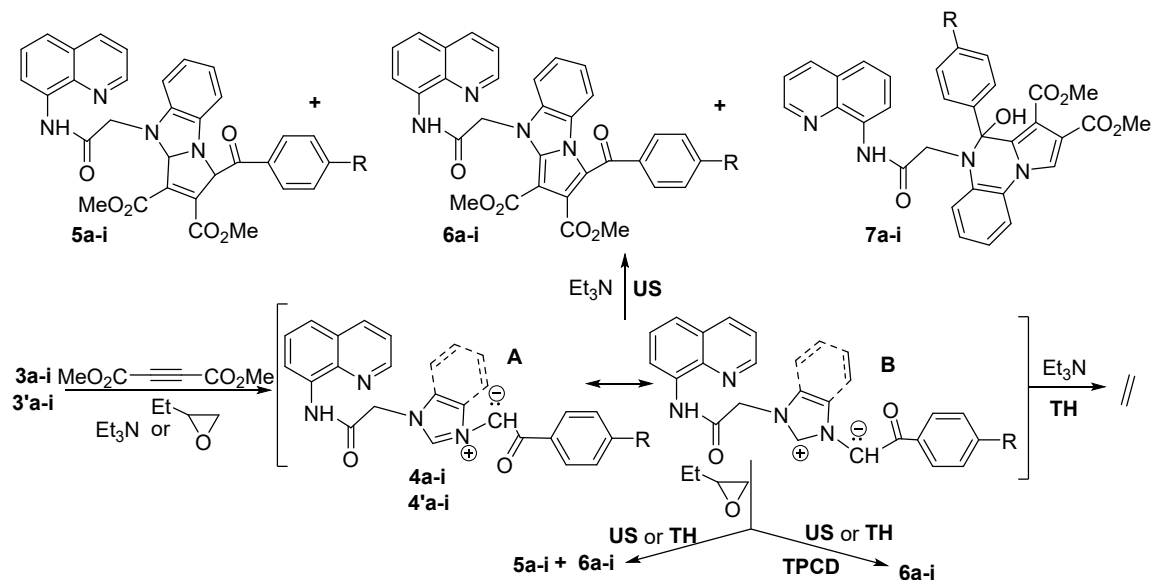

#### 3.1. General procedure for the reaction of hybrid quinoline-imidazolium salts (3a-i) with DMAD in the presence of triethylamine in chloroform under conventional TH and US irradiation

**TH:** To a suspension of a quinoline-imidazolium salt **3a-i** or **3'a-i** (1 mmol) in 20 mL of chloroform, dimethyl acetylenedicarboxylate (**DMAD**) (2.5 mmol) was added under stirring, then a solution of 2.5 mmol of triethylamine in 4 mL of chloroform was added dropwise on ice bath and the reaction mixture was stirred for 1 h at room temperature. The chloroformic solution was washed with water (3 x 30 mL) and dried on Na<sub>2</sub>SO<sub>4</sub> anhydrous. The solvent was removed under vacuum, but only decomposition products are being obtained.

**US:** A mixture of quinoline imidazolium-salt **3a-i** (1 mmol), dimethyl acetylenedicarboxylate (**DMAD**) (2.5 mmol) and triethylamine (2.5 mmol) in 20 mL of chloroform was placed in the reaction vessel and exposed to US irradiation for 2 to 4 min. The results were obtained using a pulse irradiation (5 s pulse / 5 s pause) and 50% from the full power of the generator. After each minute of irradiation a TLC was performed to see when the reaction is done. The chloroformic solution was washed with water (3 x 30 mL) and dried on Na<sub>2</sub>SO<sub>4</sub> anhydrous. The residue was triturated with MeOH giving the mixtures of the adducts dihydro-benzopyrrolo-imidazolo-quinoline, benzopyrrolo-imidazolo-quinoline and benzopyrrolo imidazolo-quinoline. with a mixture of CHCl<sub>3</sub>/MeOH giving the three types of cycloadducts: dihydro-benzopyrrolo-imidazolo quinolines (**5d**, **5i**), benzopyrrolo-imidazolo quinolines (**6a-c**, **6e-h**) and dihydro-pyrrolo-quinoxaline quinolines (**7a**, **7b**, **7d-f**)

### 3.2. General procedure for the reaction of hybrid quinoline-imidazolium salts (3a-i) with DMAD in 1,2-epoxybutane under conventional TH and US irradiation

**TH:** To a suspension of quinoline imidazolium salt **3a-i** (1 mmol) in 20 mL of 1,2-epoxybutane, dimethyl acetylenedicarboxylate (**DMAD**) (2.5 mmol) was added and stirred at room temperature for 12 to 16 h. The solvent was removed in vacuo, then 5-7 mL of MeOH added and left for 3-5 h under stirring. The solid formed was filtered and recrystallized from CHCl<sub>3</sub>/MeOH giving the mixture of two adducts dihydro-benzopyrrolo-imidazolo-quinoline and benzopyrrolo-imidazolo-quinoline. two classes of adducts the dihydro-benzopyrrolo-imidazolo quinolines (**5b-i**) and benzopyrrolo-imidazolo quinoline compounds (**6a-i**).

**US:** A mixture of quinoline-imidazolium salt **3a-i** (1 mmol) and DMAD (2.5 mmol) in 20 mL of 1,2-epoxybutane was placed in the reaction vessel and exposed to US irradiation for 150 to 180 min. The results were obtained using a pulse irradiation (5 s pulse / 5 s pause) and 50% from the full power of the generator. After each 10-20 minute of irradiation a TLC was performed to see the reactant consumption. Once the irradiation cycle was performed the reactions were processed as indicated above for TH.

### 3.3. General procedure for the reaction of hybrid quinoline-imidazolium salts (3a-i) with DMAD in 1,2-epoxybutane and TPCD under conventional TH and US irradiation

**TH:** To a suspension of quinoline-imidazolium salt **3a-i** (1 mmol) in 20 mL of 1,2-epoxybutane, dimethyl acetylenedicarboxylate (**DMAD**) (2.5 mmol) and 0.4 g TPCD were added. The reaction mixture was stirred at room temperature for 5 to 8 h. The solid part was filtered through a pad of Celite 545 and washed with 50-70 mL of CHCl<sub>3</sub>. The filtrate was evaporated under vacuum, then the crude mixture was triturated with MeOH and the solid part was filtered and recrystallized from CHCl<sub>3</sub>/MeOH to obtain benzopyrrolo-imidazolo quinoline compounds (**6a-i**).

**US:** A mixture of quinoline-imidazolium salt **3a-i** (1 mmol), DMAD (2.5 mmol) and 0.4 g of TPCD in 20 mL of 1,2-epoxybutane, was placed in the reaction vessel and exposed to US irradiation for 16-20 min. The results were obtained using a pulse irradiation (5 s pulse / 5 s pause) and 50% from the full power of the generator. After each 3-5 minute of irradiation a TLC was performed to see when the reaction is done. Once the irradiation cycle was performed the reactions were processed as indicated above for TH.

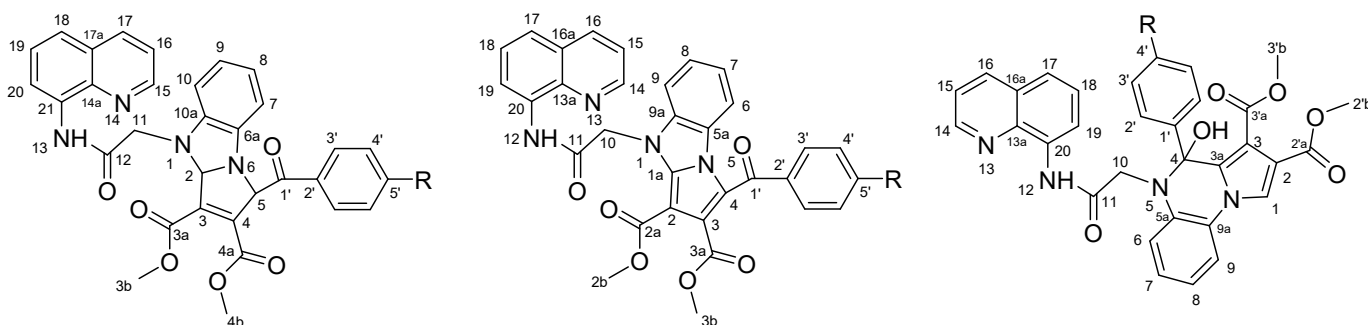

dimethyl 1-(4-chlorobenzoyl)-4-(2-oxo-2-(quinolin-8-ylamino)ethyl)-3a,4-dihydro-1H-benzo[d]pyrrolo[1,2-a]imidazole-2,3-dicarboxylate (**5b**)

White powder (precipitated with dichloromethane/diethylether); mp 185-187 °C; IR (KBr) v/cm<sup>-1</sup>: 3309, 3013, 2984, 1706, 1495, 1292, 752; <sup>1</sup>H-NMR (500 MHz, CDCl<sub>3</sub>): δ<sub>ppm</sub>: 3.40 (3H: H<sub>3b</sub>, s), 3.79 (3H: H<sub>4b</sub>, s), 4.04-4.01 (1H: H<sub>11b</sub>, J<sub>11b,11a</sub> = 17.5 Hz, d), 4.17-4.14 (1H: H<sub>11a</sub>, J<sub>11a,11b</sub> = 17.5 Hz, d), 4.647-4.642 (1H: H<sub>2</sub>, J<sub>2,5</sub> = 2.5 Hz, ad), 5.64-5.63 (1H: H<sub>5</sub>, J<sub>5,2</sub> = 2.5 Hz, ad), 6.54-6.53 (1H: H<sub>10</sub>, J<sub>10,9</sub> = 7.0 Hz, ad), 6.60-6.59 (1H: H<sub>9</sub>, J = 8.0 Hz, t), 6.65-6.63 (1H: H<sub>7</sub>, J<sub>7,8</sub> = 7.5 Hz, d), 6.97-6.95 (1H: H<sub>8</sub>, J = 8.0 Hz, t), 7.37-



7.35 (1H: H<sub>19</sub>, m), 7.44-7.42 (1H: H<sub>16</sub>, bs), 7.59-7.55 (3H: 2xH<sub>4</sub>, H<sub>18</sub>, m), 8.03-8.01 (2H: 2xH<sub>3</sub>, J<sub>3',4'</sub> = 7.0 Hz, ad), 8.14-8.12 (1H: H<sub>20</sub>, J<sub>20,19</sub> = 8.5 Hz, ad), 8.49-8.48 (1H: H<sub>17</sub>, J<sub>17,16</sub> = 8.5 Hz, ad), 8.80-8.79 (1H: H<sub>15</sub>, J<sub>15,16</sub> = 6.5 Hz, J<sub>15,17</sub> = 1.5 Hz, add), 11.10 (1H: H<sub>13</sub>, s). <sup>13</sup>C{<sup>1</sup>H}-NMR (125 MHz, CDCl<sub>3</sub>): δ<sub>ppm</sub>: 51.49 (C<sub>4b</sub>), 52.73 (C<sub>11</sub>), 53.04 (C<sub>3b</sub>), 54.10 (C<sub>2</sub>), 91.20 (C<sub>5</sub>), 109.00 (C<sub>7</sub>), 109.25 (C<sub>10a</sub>), 116.76 (C<sub>3</sub>), 117.11 (C<sub>6a</sub>), 121.02 (C<sub>16</sub>), 121.69 (C<sub>18</sub>), 122.49 (C<sub>8</sub>), 126.89 (2xC<sub>4</sub>), 127.40 (C<sub>17</sub>), 128.12 (C<sub>19</sub>, C<sub>17a</sub>), 128.82 (C<sub>4</sub>), 130.62 (2xC<sub>3</sub>), 131.68 (C<sub>2</sub>), 132.12 (C<sub>20</sub>), 133.65 (C<sub>9</sub>), 136.59 (C<sub>21</sub>), 137.79 (C<sub>5</sub>), 138.88 (C<sub>14a</sub>), 143.09 (C<sub>10</sub>), 148.81 (C<sub>15</sub>), 157.59 (C<sub>4a</sub>), 164.72 (C<sub>3a</sub>), 167.54 (C<sub>12</sub>), 188.13 (C<sub>1</sub>). Anal. calcd. C<sub>32</sub>H<sub>25</sub>ClN<sub>4</sub>O<sub>6</sub>: C, 64.38; H, 4.22; N, 9.38; Found: C, 64.45; H, 4.16; N, 9.47.

dimethyl 1-(4-methylbenzoyl)-4-(2-oxo-2-(quinolin-8-ylamino)ethyl)-3a,4-dihydro-1H-benzo[d]pyrrolo[1,2-a]imidazole-2,3-dicarboxylate (**5c**)

White powder (precipitated with dichloromethane/diethylether); mp 191-192 °C; IR (KBr) v/cm<sup>-1</sup>: 3298, 3004, 2986, 1702, 1553; <sup>1</sup>H-NMR (500 MHz, CDCl<sub>3</sub>): δ<sub>ppm</sub>: 2.38 (3H: *p*-CH<sub>3</sub>, s), 3.40 (3H: H<sub>3b</sub>, s), 3.78 (3H: H<sub>4b</sub>, s), 4.05-4.02 (1H: H<sub>11b</sub>, J<sub>11b,11a</sub> = 17.5 Hz, d), 4.17-4.14 (1H: H<sub>11a</sub>, J<sub>11a,11b</sub> = 17.5 Hz, d), 4.67-4.66 (1H: H<sub>2</sub>, J<sub>2,5</sub> = 2.5 Hz, ad), 5.656-5.651 (1H: H<sub>5</sub>, J<sub>5,2</sub> = 2.5 Hz, ad), 6.60-6.55 (2H: H<sub>10</sub>, H<sub>9</sub>, m), 6.64-6.62 (1H: H<sub>7</sub>, J<sub>7,8</sub> = 7.5 Hz, d), 6.94-6.91 (1H: H<sub>8</sub>, J = 8.0 Hz, t), 7.20 (2H: (2H: 2xH<sub>4</sub>, bs), 7.37-7.32 (1H: H<sub>19</sub>, m), 7.46-7.42 (2H: H<sub>16</sub>, H<sub>18</sub>, m), 7.986-7.981 (2H: 2xH<sub>3</sub>, J<sub>3',4'</sub> = 2.5 Hz, ad), 8.14-8.12 (1H: H<sub>20</sub>, J<sub>20,19</sub> = 8.0 Hz, d), 8.56 (1H: H<sub>17</sub>, bs), 8.79-8.78 (1H: H<sub>15</sub>, J<sub>15,16</sub> = 5.5 Hz, d), 11.14 (1H: H<sub>13</sub>, s). <sup>13</sup>C{<sup>1</sup>H}-NMR (125 MHz, CDCl<sub>3</sub>): δ<sub>ppm</sub>: 21.34 (*p*-CH<sub>3</sub>), 51.56 (C<sub>4b</sub>), 52.61 (C<sub>11</sub>), 53.06 (C<sub>3b</sub>), 57.98 (C<sub>2</sub>), 90.85 (C<sub>5</sub>), 108.54 (C<sub>7</sub>, C<sub>17a</sub>), 109.21 (C<sub>10a</sub>), 116.48 (C<sub>3</sub>), 117.02 (C<sub>6a</sub>), 121.02 (C<sub>16</sub>), 121.78 (C<sub>18</sub>), 122.51 (C<sub>8</sub>), 127.67 (C<sub>17</sub>), 128.13 (C<sub>19</sub>), 128.93 (2xC<sub>4</sub>), 129.09 (C<sub>4</sub>), 129.36 (2xC<sub>3</sub>), 130.70 (C<sub>2</sub>), 132.04 (C<sub>20</sub>), 133.62 (C<sub>9</sub>), 135.94 (C<sub>21</sub>), 138.90 (C<sub>14a</sub>), 142.81 (C<sub>5</sub>), 143.14 (C<sub>10</sub>), 148.86 (C<sub>15</sub>), 157.69 (C<sub>4a</sub>), 164.67 (C<sub>3a</sub>), 167.49 (C<sub>12</sub>), 188.07 (C<sub>1</sub>). Anal. calcd. C<sub>33</sub>H<sub>28</sub>N<sub>4</sub>O<sub>6</sub>: C, 68.74; H, 4.89; N, 9.72; Found: C, 68.81; H, 4.79; N, 9.78.

dimethyl 1-(4-cyanobenzoyl)-4-(2-oxo-2-(quinolin-8-ylamino)ethyl)-3a,4-dihydro-1H-benzo[d]pyrrolo[1,2-a]imidazole-2,3-dicarboxylate (**5d**)

White powder (precipitated with dichloromethane/diethylether); mp 205-207 °C; IR (KBr) v/cm<sup>-1</sup>: 3327, 3012, 2959, 2231, 1698, 1624, 1532; <sup>1</sup>H-NMR (500 MHz, CDCl<sub>3</sub>): δ<sub>ppm</sub>: 3.39 (3H: H<sub>3b</sub>, s), 3.79 (3H: H<sub>4b</sub>, s), 4.05-4.02 (1H: H<sub>11b</sub>, J<sub>11b,11a</sub> = 17.5 Hz, d), 4.18-4.15 (1H: H<sub>11a</sub>, J<sub>11a,11b</sub> = 17.5 Hz, d), 4.63-4.62 (1H: H<sub>2</sub>, J<sub>2,5</sub> = 2.5 Hz, ad), 5.655-5.650 (1H: H<sub>5</sub>, J<sub>5,2</sub> = 2.5 Hz, ad), 6.52-6.50 (1H: H<sub>10</sub>, J<sub>10,9</sub> = 7.5 Hz, d), 6.61-6.58 (1H: H<sub>9</sub>, J = 8.0 Hz, t), 6.67-6.65 (1H: H<sub>7</sub>, J<sub>7,8</sub> = 7.5 Hz, d), 6.98-6.95 (1H: H<sub>8</sub>, J = 8.0 Hz, t), 7.37-7.35 (1H: H<sub>19</sub>, m), 7.48-7.46 (1H: H<sub>16</sub>, H<sub>18</sub>, m), 7.68-7.66 (2H: 2xH<sub>4</sub>, J<sub>4',3'</sub> = 7.5 Hz, ad), 7.88 (2H: 2xH<sub>3</sub>, bs), 8.43-8.41 (1H: H<sub>20</sub>, J<sub>20,19</sub> = 8.0 Hz, d), 8.66-8.64 (1H: H<sub>17</sub>, J<sub>17,16</sub> = 8.5 Hz, d), 8.82-8.80 (1H: H<sub>15</sub>, J<sub>15,16</sub> = 6.5 Hz, J<sub>15,17</sub> = 2.0 Hz, add), 11.06 (1H: H<sub>13</sub>, s). <sup>13</sup>C{<sup>1</sup>H}-NMR (125 MHz, CDCl<sub>3</sub>): δ<sub>ppm</sub>: 51.56 (C<sub>4b</sub>), 52.59 (C<sub>11</sub>), 53.04 (C<sub>3b</sub>), 57.95 (C<sub>2</sub>), 90.61 (C<sub>5</sub>), 108.57 (C<sub>7</sub>, C<sub>17a</sub>), 109.19 (C<sub>10a</sub>), 116.44 (C<sub>3</sub>), 117.13 (C<sub>6a</sub>), 117.65 (C<sub>5</sub>), 118.26 (*p*-CN), 121.11 (C<sub>16</sub>), 122.01 (C<sub>18</sub>), 122.51 (C<sub>8</sub>), 127.72 (C<sub>17</sub>), 128.09 (C<sub>19</sub>), 129.13 (C<sub>4</sub>), 129.50 (2xC<sub>3</sub>), 132.04 (C<sub>20</sub>), 132.59 (2xC<sub>4</sub>), 133.59 (C<sub>9</sub>), 135.94 (C<sub>21</sub>), 137.89 (C<sub>2</sub>), 138.82 (C<sub>14a</sub>), 143.10 (C<sub>10</sub>), 148.91 (C<sub>15</sub>), 157.42 (C<sub>4a</sub>), 164.52 (C<sub>3a</sub>), 168.50 (C<sub>12</sub>), 187.35 (C<sub>1</sub>). Anal. calcd. C<sub>33</sub>H<sub>25</sub>N<sub>5</sub>O<sub>6</sub>: C, 67.46; H, 4.29; N, 11.92; Found: C, 67.51; H, 4.20; N, 11.96.

dimethyl 1-(4-fluorobenzoyl)-4-(2-oxo-2-(quinolin-8-ylamino)ethyl)-3a,4-dihydro-1H-benzo[d]pyrrolo[1,2-a]imidazole-2,3-dicarboxylate (**5e**)

White powder (precipitated with dichloromethane/diethylether); mp 208-210 °C; IR (KBr) v/cm<sup>-1</sup>: 3297, 3018, 2960, 1691, 1597, 1237; <sup>1</sup>H-NMR (500 MHz, CDCl<sub>3</sub>): δ<sub>ppm</sub>: 3.41 (3H: H<sub>3b</sub>, s), 3.79 (3H: H<sub>4b</sub>, s), 4.07-4.03 (1H: H<sub>11b</sub>, J<sub>11b,11a</sub> = 17.5 Hz, d), 4.19-4.15 (1H: H<sub>11a</sub>, J<sub>11a,11b</sub> = 17.5 Hz, d), 4.646-4.641 (1H: H<sub>2</sub>, J<sub>2,5</sub> = 2.5 Hz, ad), 5.658-5.653 (1H: H<sub>5</sub>, J<sub>5,2</sub> = 2.5 Hz, ad), 6.54-6.53 (1H: H<sub>10</sub>, J<sub>10,9</sub> = 7.0 Hz, d), 6.61-6.58 (1H: H<sub>9</sub>, J = 7.5 Hz, t), 6.65-6.64 (1H: H<sub>7</sub>, J<sub>7,8</sub> = 7.5 Hz, d), 6.96-6.93 (1H: H<sub>8</sub>, J = 8.0 Hz, t), 7.06 (2H:

2xH<sub>4</sub>, bs), 7.37-7.34 (1H: H<sub>19</sub>, m), 7.48-7.44 (1H: H<sub>16</sub>, H<sub>18</sub>, m), 8.15 (3H: 2xH<sub>3</sub>, H<sub>20</sub>, bs), 8.52 (1H: H<sub>17</sub>, bs), 8.81-8.76 (1H: H<sub>15</sub>,  $J_{15,16}$  = 5.5 Hz, d), 11.12 (1H: H<sub>13</sub>, s). <sup>13</sup>C{<sup>1</sup>H}-NMR (125 MHz, CDCl<sub>3</sub>): δ<sub>ppm</sub>: 51.54 (C<sub>4b</sub>), 52.60 (C<sub>11</sub>), 53.06 (C<sub>3b</sub>), 57.89 (C<sub>2</sub>), 89.98 (C<sub>5</sub>), 108.56 (C<sub>7</sub>), 109.12 (C<sub>17a</sub>), 109.21 (C<sub>10a</sub>), 115.02 (2xC<sub>4</sub>,  $J_{C4-F}$  = 24.40 Hz, d), 116.39 (C<sub>3</sub>), 117.12 (C<sub>6a</sub>), 121.12 (C<sub>16</sub>), 122.06 (C<sub>18</sub>), 122.50 (C<sub>8</sub>), 127.72 (C<sub>17</sub>), 128.12 (C<sub>19</sub>), 129.21 (C<sub>4</sub>), 129.35 (C<sub>2</sub>,  $J_{C2-F}$  = 2.44 Hz, d), 130.40 (2xC<sub>3</sub>,  $J_{C3-F}$  = 8.22 Hz, d), 132.04 (C<sub>20</sub>), 133.59 (C<sub>9</sub>), 135.91 (C<sub>21</sub>), 138.74 (C<sub>14a</sub>), 141.91 (C<sub>10</sub>), 148.90 (C<sub>15</sub>), 157.60 (C<sub>4a</sub>), 164.76 (C<sub>3a</sub>), 167.30 (C<sub>5</sub>,  $J_{C5-F}$  = 252.12 Hz, d), 168.51 (C<sub>12</sub>), 187.40 (C<sub>1</sub>). Anal. calcd. C<sub>32</sub>H<sub>25</sub>FN<sub>4</sub>O<sub>6</sub>: C, 66.20; H, 4.34; N, 9.65; Found: C, 66.11; H, 4.38; N, 9.59.

dimethyl 1-(4-bromobenzoyl)-4-(2-oxo-2-(quinolin-8-ylamino)ethyl)-3a,4-dihydro-1H-benzo[d]pyrrolo[1,2-a]imidazole-2,3-dicarboxylate (**5f**)

White powder (precipitated with dichloromethane/diethylether); mp 213-215 °C; IR (KBr) v/cm<sup>-1</sup>: 3285, 3008, 2975, 1702, 1544, 1237, 673; <sup>1</sup>H-NMR (500 MHz, CDCl<sub>3</sub>): δ<sub>ppm</sub>: 3.40 (3H: H<sub>3b</sub>, s), 3.78 (3H: H<sub>4b</sub>, s), 4.04-4.01 (1H: H<sub>11b</sub>,  $J_{11b,11a}$  = 17.5 Hz, d), 4.17-4.13 (1H: H<sub>11a</sub>,  $J_{11a,11b}$  = 17.5 Hz, d), 4.645-4.640 (1H: H<sub>2</sub>,  $J_{2,5}$  = 2.5 Hz, ad), 5.64-5.63 (1H: H<sub>5</sub>,  $J_{5,2}$  = 2.5 Hz, ad), 6.54-6.53 (1H: H<sub>10</sub>,  $J_{10,9}$  = 7.0 Hz, ad), 6.65-6.60 (2H: H<sub>9</sub>, H<sub>7</sub>, m), 6.96-6.92 (1H: H<sub>8</sub>,  $J$  = 8.0 Hz, t), 7.37-7.35 (1H: H<sub>19</sub>, m), 7.47-7.43 (2H: H<sub>16</sub>, H<sub>18</sub>, m), 7.83 (2H: 2xH<sub>4</sub>, bs), 7.95-7.93 (2H: 2xH<sub>3</sub>,  $J_{3,4}$  = 7.5 Hz, ad), 8.22-8.20 (1H: H<sub>20</sub>,  $J_{20,19}$  = 8.0 Hz, d), 8.50-8.48 (1H: H<sub>17</sub>,  $J_{17,16}$  = 8.0 Hz, d), 8.80-8.78 (1H: H<sub>15</sub>,  $J_{15,16}$  = 6.5 Hz,  $J_{15,17}$  = 2.5 Hz, add), 11.14 (1H: H<sub>13</sub>, s). <sup>13</sup>C{<sup>1</sup>H}-NMR (125 MHz, CDCl<sub>3</sub>): δ<sub>ppm</sub>: 51.74 (C<sub>4b</sub>), 52.75 (C<sub>11</sub>), 53.18 (C<sub>3b</sub>), 57.89 (C<sub>2</sub>), 91.52 (C<sub>5</sub>), 108.55 (C<sub>7</sub>), 109.12 (C<sub>17a</sub>), 109.20 (C<sub>10a</sub>), 116.40 (C<sub>3</sub>), 117.11 (C<sub>6a</sub>), 121.16 (C<sub>16</sub>), 122.44 (C<sub>18</sub>), 122.50 (C<sub>8</sub>), 126.87 (C<sub>5</sub>), 127.69 (C<sub>17</sub>), 128.14 (C<sub>19</sub>), 129.84 (2xC<sub>3</sub>), 130.06 (C<sub>4</sub>), 131.53 (2xC<sub>4</sub>), 132.05 (C<sub>20</sub>), 132.61 (C<sub>2</sub>), 133.59 (C<sub>9</sub>), 135.91 (C<sub>21</sub>), 138.75 (C<sub>14a</sub>), 141.91 (C<sub>10</sub>), 148.94 (C<sub>15</sub>), 157.71 (C<sub>4a</sub>), 164.79 (C<sub>3a</sub>), 168.49 (C<sub>12</sub>), 187.46 (C<sub>1</sub>). Anal. calcd. C<sub>32</sub>H<sub>25</sub>BrN<sub>4</sub>O<sub>6</sub>: C, 59.92; H, 3.93; N, 8.73; Found: C, 60.05; H, 3.89; N, 8.80.

dimethyl 1-([1,1'-biphenyl]-4-carbonyl)-4-(2-oxo-2-(quinolin-8-ylamino)ethyl)-3a,4-dihydro-1H-benzo[d]pyrrolo[1,2-a]imidazole-2,3-dicarboxylate (**5g**)

White powder (precipitated with dichloromethane/diethylether); mp 198-201 °C; IR (KBr) v/cm<sup>-1</sup>: 3321, 3007, 2977, 1687, 1538, 1183; <sup>1</sup>H-NMR (500 MHz, CDCl<sub>3</sub>): δ<sub>ppm</sub>: 3.41 (3H: H<sub>3b</sub>, s), 3.79 (3H: H<sub>4b</sub>, s), 4.06-4.02 (1H: H<sub>11b</sub>,  $J_{11b,11a}$  = 17.5 Hz, d), 4.19-4.15 (1H: H<sub>11a</sub>,  $J_{11a,11b}$  = 17.5 Hz, d), 4.688-4.683 (1H: H<sub>2</sub>,  $J_{2,5}$  = 2.5 Hz, ad), 5.675-5.670 (1H: H<sub>5</sub>,  $J_{5,2}$  = 2.5 Hz, ad), 6.60 (2H: H<sub>10</sub>, H<sub>9</sub>, bs), 6.65-6.64 (1H: H<sub>7</sub>,  $J_{7,8}$  = 8.0 Hz, d), 6.96-6.93 (1H: H<sub>8</sub>,  $J$  = 8.0 Hz, t), 7.36-7.34 (1H: H<sub>19</sub>, m), 7.50 (5H: H<sub>16</sub>, H<sub>16</sub>, 2xH<sub>8</sub>, H<sub>9</sub>, bs), 7.80 (4H: 2xH<sub>4</sub>, 2xH<sub>7</sub>, bs), 8.07 (2H: 2xH<sub>3</sub>, bs), 8.45-8.40 (1H: H<sub>20</sub>, m), 8.65-8.62 (1H: H<sub>17</sub>,  $J_{17,16}$  = 8.5 Hz, ad), 8.80-8.79 (1H: H<sub>15</sub>,  $J_{15,16}$  = 6.5 Hz,  $J_{15,17}$  = 2.0 Hz, add), 11.11 (1H: H<sub>13</sub>, s). <sup>13</sup>C{<sup>1</sup>H}-NMR (125 MHz, CDCl<sub>3</sub>): δ<sub>ppm</sub>: 51.55 (C<sub>4b</sub>), 52.62 (C<sub>11</sub>), 53.08 (C<sub>3b</sub>), 56.07 (C<sub>2</sub>), 90.52 (C<sub>5</sub>), 108.61 (C<sub>7</sub>, C<sub>17a</sub>), 109.19 (C<sub>10a</sub>), 116.57 (C<sub>3</sub>), 117.13 (C<sub>6a</sub>), 121.17 (C<sub>16</sub>), 122.11 (C<sub>18</sub>), 122.49 (C<sub>8</sub>), 127.76 (C<sub>17</sub>), 127.84 (2xC<sub>4</sub>, C<sub>9</sub>), 128.15 (C<sub>19</sub>), 129.50 (2xC<sub>3</sub>, 2xC<sub>7</sub>), 129.84 (2xC<sub>8</sub>), 130.03 (C<sub>4</sub>), 132.02 (C<sub>20</sub>), 132.45 (C<sub>2</sub>), 133.61 (C<sub>9</sub>), 135.94 (C<sub>21</sub>), 138.82 (C<sub>14a</sub>), 140.81 (C<sub>6</sub>), 143.11 (C<sub>10</sub>), 145.20 (C<sub>5</sub>), 148.92 (C<sub>15</sub>), 157.40 (C<sub>4a</sub>), 164.48 (C<sub>3a</sub>), 168.50 (C<sub>12</sub>), 187.31 (C<sub>1</sub>). Anal. calcd. C<sub>38</sub>H<sub>30</sub>N<sub>4</sub>O<sub>6</sub>: C, 71.46; H, 4.73; N, 8.77; Found: C, 71.51; H, 4.64; N, 8.83.

dimethyl 1-benzoyl-4-(2-oxo-2-(quinolin-8-ylamino)ethyl)-3a,4-dihydro-1H-benzo[d]pyrrolo[1,2-a]imidazole-2,3-dicarboxylate (**5h**)

White powder (precipitated with dichloromethane/diethylether); mp 177-179 °C; IR (KBr) v/cm<sup>-1</sup>: 3284, 3014, 2973, 1695, 1684, 1183; <sup>1</sup>H-NMR (500 MHz, CDCl<sub>3</sub>): δ<sub>ppm</sub>: 3.40 (3H: H<sub>3b</sub>, s), 3.78 (3H: H<sub>4b</sub>, s), 4.06-4.03 (1H: H<sub>11b</sub>,  $J_{11b,11a}$  = 17.5 Hz, d), 4.19-4.16 (1H: H<sub>11a</sub>,  $J_{11a,11b}$  = 17.5 Hz, d), 4.687-4.682 (1H: H<sub>2</sub>,  $J_{2,5}$  = 2.5 Hz, ad), 5.676-5.671 (1H: H<sub>5</sub>,  $J_{5,2}$  = 2.5 Hz, ad), 6.60 (2H: H<sub>10</sub>, H<sub>9</sub>, m), 6.66-6.64 (1H: H<sub>7</sub>,  $J_{7,8}$  = 8.0 Hz, d), 6.96-6.93 (1H: H<sub>8</sub>,  $J$  = 8.0 Hz, t), 7.38-7.36 (1H: H<sub>19</sub>, m), 7.50-7.44 (2H: H<sub>16</sub>, H<sub>18</sub>, m), 7.64

(3H: 2xH<sub>4</sub><sup>'</sup>, H<sub>10</sub><sup>'</sup>, bs), 8.04 (2H: 2xH<sub>3</sub><sup>'</sup>, bs), 8.45-8.41 (1H: H<sub>20</sub>, m), 8.66-8.63 (1H: H<sub>17</sub>,  $J_{17,16}$  = 8.5 Hz, ad), 8.81-8.80 (1H: H<sub>15</sub>,  $J_{15,16}$  = 6.5 Hz,  $J_{15,17}$  = 2.0 Hz, add), 11.07 (1H: H<sub>13</sub>, s). <sup>13</sup>C{<sup>1</sup>H}-NMR (125 MHz, CDCl<sub>3</sub>): δ<sub>ppm</sub>: 51.50 (C<sub>4b</sub>), 52.64 (C<sub>11</sub>), 53.12 (C<sub>3b</sub>), 54.24 (C<sub>2</sub>), 91.07 (C<sub>5</sub>), 108.56 (C<sub>7</sub>), 108.84 (C<sub>17a</sub>), 109.20 (C<sub>10a</sub>), 116.41 (C<sub>3</sub>), 117.07 (C<sub>6a</sub>), 120.82 (C<sub>16</sub>), 121.79 (C<sub>18</sub>), 122.52 (C<sub>8</sub>), 127.45 (C<sub>17</sub>), 128.19 (C<sub>19</sub>), 128.64 (2xC<sub>4</sub><sup>'</sup>), 128.89 (2xC<sub>3</sub><sup>'</sup>), 129.26 (C<sub>4</sub>), 132.18 (C<sub>20</sub>), 133.63 (C<sub>9</sub>), 133.74 (C<sub>5</sub><sup>'</sup>), 134.56 (C<sub>2</sub><sup>'</sup>), 136.60 (C<sub>21</sub>), 138.89 (C<sub>14a</sub>), 143.11 (C<sub>10</sub>), 148.79 (C<sub>15</sub>), 157.56 (C<sub>4a</sub>), 164.57 (C<sub>3a</sub>), 167.53 (C<sub>12</sub>), 188.30 (C<sub>1</sub><sup>'</sup>). Anal. calcd. C<sub>32</sub>H<sub>26</sub>N<sub>4</sub>O<sub>6</sub>: C, 68.32; H, 4.66; N, 9.96; Found: C, 68.41; H, 4.58; N, 10.02.

dimethyl 1-(4-methoxybenzoyl)-4-(2-oxo-2-(quinolin-8-ylamino)ethyl)-3a,4-dihydro-1H-benzo[*d*]pyrrolo[1,2-*a*]imidazole-2,3-dicarboxylate (**5i**)

White powder (precipitated with dichloromethane/diethylether); mp 194-196 °C; IR (KBr) v/cm<sup>-1</sup>: 3281, 3031, 2972, 1707, 1483, 1374, 1127; <sup>1</sup>H-NMR (500 MHz, CDCl<sub>3</sub>): δ<sub>ppm</sub>: 3.41 (3H: H<sub>3b</sub>, s), 3.78 (3H: H<sub>4b</sub>, s), 3.82 (3H: *p*-OCH<sub>3</sub>, s), 4.06-4.03 (1H: H<sub>11b</sub>,  $J_{11b,11a}$  = 17.5 Hz, d), 4.18-4.14 (1H: H<sub>11a</sub>,  $J_{11a,11b}$  = 17.5 Hz, d), 4.66-4.65 (1H: H<sub>2</sub>,  $J_{2,5}$  = 2.5 Hz, ad), 5.65-5.64 (1H: H<sub>5</sub>,  $J_{5,2}$  = 2.5 Hz, ad), 6.59 (2H: 2xH<sub>4</sub><sup>'</sup>, bs), 6.64-6.62 (1H: H<sub>7</sub>,  $J_{7,8}$  = 7.5 Hz, d), 6.94-6.91 (3H: H<sub>8</sub>, H<sub>9</sub>, H<sub>10</sub>, m), 7.38-7.36 (1H: H<sub>19</sub>, m), 7.59-7.55 (2H: H<sub>16</sub>, H<sub>18</sub>, m), 8.06 (2H: 2xH<sub>3</sub><sup>'</sup>, bs), 8.15-8.14 (1H: H<sub>17</sub>,  $J_{17,16}$  = 8.0 Hz, d), 8.58 (1H: H<sub>20</sub>, bs), 8.79 (1H: H<sub>15</sub>, bs), 11.15 (1H: H<sub>13</sub>, s). <sup>13</sup>C{<sup>1</sup>H}-NMR (125 MHz, CDCl<sub>3</sub>): δ<sub>ppm</sub>: 51.51 (C<sub>4b</sub>), 52.65 (C<sub>11</sub>), 53.09 (C<sub>3b</sub>), 54.11 (C<sub>2</sub>), 55.69 (*p*-OCH<sub>3</sub>), 91.19 (C<sub>5</sub>), 108.56 (C<sub>7</sub>, C<sub>17a</sub>), 109.22 (C<sub>10a</sub>), 114.42 (2xC<sub>4</sub><sup>'</sup>), 116.44 (C<sub>3</sub>), 117.07 (C<sub>6a</sub>), 120.93 (C<sub>16</sub>), 121.72 (C<sub>18</sub>), 122.48 (C<sub>8</sub>), 126.63 (2xC<sub>3</sub><sup>'</sup>), 127.38 (C<sub>17</sub>), 128.14 (C<sub>19</sub>), 128.94 (C<sub>4</sub>), 132.09 (C<sub>20</sub>), 133.63 (C<sub>9</sub>), 132.68 (C<sub>2</sub><sup>'</sup>), 135.92 (C<sub>21</sub>), 138.80 (C<sub>14a</sub>), 143.10 (C<sub>10</sub>), 148.82 (C<sub>15</sub>), 157.56 (C<sub>4a</sub>), 164.19 (C<sub>5</sub><sup>'</sup>), 164.67 (C<sub>3a</sub>), 167.49 (C<sub>12</sub>), 188.07 (C<sub>1</sub><sup>'</sup>). Anal. calcd. C<sub>33</sub>H<sub>28</sub>N<sub>4</sub>O<sub>7</sub>: C, 66.88; H, 4.76; N, 9.45; Found: C, 66.79; H, 4.83; N, 9.38.

dimethyl 1-(4-nitrobenzoyl)-4-(2-oxo-2-(quinolin-8-ylamino)ethyl)-4H-benzo[*d*]pyrrolo[1,2-*a*]imidazole-2,3-dicarboxylate (**6a**):

Yellow powder (precipitated with methanol); mp 268-271 °C; IR (KBr): v/cm<sup>-1</sup>: 3335, 3007, 2982, 1732, 1691, 1624, 1539, 1494, 1342, 1226; <sup>1</sup>H-NMR (500 MHz, CDCl<sub>3</sub>): δ<sub>ppm</sub>: 3.31 (3H: H<sub>2b</sub>, s), 3.77 (3H: H<sub>3b</sub>, s), 5.84 (2H: H<sub>10</sub>, s), 7.39-7.36 (1H: H<sub>7</sub>,  $J$  = 8.0 Hz, t), 7.55-7.45 (4H: H<sub>8</sub>, H<sub>15</sub>, H<sub>17</sub>, H<sub>18</sub>, m), 7.59-7.57 (1H: H<sub>9</sub>,  $J_{9,8}$  = 8.0 Hz, d), 7.91-7.90 (2H: 2xH<sub>3</sub><sup>'</sup>,  $J_{3',4'}$  = 8.5 Hz, d), 8.18-8.17 (1H: H<sub>16</sub>,  $J_{16,15}$  = 8.0 Hz, d), 8.32-8.30 (2H: 2xH<sub>4</sub><sup>'</sup>,  $J_{4',3'}$  = 9.0 Hz, d), 8.67-8.63 (2H: H<sub>6</sub>, H<sub>19</sub>, m), 8.74-8.73 (1H: H<sub>14</sub>,  $J_{14,15}$  = 3.5 Hz, ad), 10.36 (1H: H<sub>12</sub>, s); <sup>13</sup>C{<sup>1</sup>H}-NMR (125 MHz, CDCl<sub>3</sub>): δ<sub>ppm</sub>: 49.57 (C<sub>10</sub>), 52.18 (C<sub>3b</sub>), 52.41 (C<sub>2b</sub>), 92.72 (C<sub>2</sub>), 110.49 (C<sub>9</sub>), 117.22 (C<sub>6</sub>, C<sub>19</sub>), 118.58 (C<sub>3</sub>), 121.90 (C<sub>15</sub>), 122.57 (C<sub>17</sub>), 122.78 (C<sub>7</sub>), 123.31 (2xC<sub>4</sub><sup>'</sup>), 125.88 (C<sub>8</sub>), 126.84 (C<sub>18</sub>), 127.59 (C<sub>16a</sub>), 128.17 (C<sub>5a</sub>), 129.95 (2xC<sub>3</sub><sup>'</sup>), 132.74 (C<sub>4</sub>), 133.63 (C<sub>16</sub>, C<sub>20</sub>), 137.11 (C<sub>9a</sub>, C<sub>13a</sub>), 142.74 (C<sub>1a</sub>), 144.77 (C<sub>2</sub><sup>'</sup>), 148.21 (C<sub>14</sub>), 149.60 (C<sub>5</sub><sup>'</sup>), 163.14 (C<sub>3a</sub>), 164.86 (C<sub>2a</sub>), 165.05 (C<sub>11</sub>), 182.57 (C<sub>1</sub><sup>'</sup>). Anal. calcd. C<sub>32</sub>H<sub>23</sub>N<sub>5</sub>O<sub>8</sub>: C, 63.47; H, 3.83; N, 11.57; Found: C, 63.57; H, 3.88; N, 11.42.

dimethyl 1-(4-chlorobenzoyl)-4-(2-oxo-2-(quinolin-8-ylamino)ethyl)-4H-benzo[*d*]pyrrolo[1,2-*a*]imidazole-2,3-dicarboxylate (**6b**)

Yellow powder (precipitated with methanol); mp 206-208 °C; IR (KBr): v/cm<sup>-1</sup>: 3320, 3010, 2970, 1730, 1689, 1630, 1301, 1210, 750; <sup>1</sup>H-NMR (500 MHz, DMSO-*d*6): δ<sub>ppm</sub>: 3.29 (3H: H<sub>2b</sub>, s), 3.62 (3H: H<sub>3b</sub>, s), 5.94 (2H: H<sub>10</sub>, s), 7.39-7.37 (1H: H<sub>7</sub>,  $J$  = 7.5 Hz, t), 7.56-7.49 (2H: H<sub>8</sub>, H<sub>15</sub>, m), 7.60-7.58 (2H: 2xH<sub>4</sub><sup>'</sup>,  $J_{4',3'}$  = 8.0 Hz, d), 7.73-7.67 (4H: 2xH<sub>3</sub><sup>'</sup>, H<sub>17</sub>, H<sub>18</sub>, m), 7.85-7.84 (1H: H<sub>9</sub>,  $J_{9,8}$  = 8.0 Hz, d), 8.38-8.37 (1H: H<sub>16</sub>,  $J_{16,15}$  = 8.0 Hz, d), 8.45-8.43 (1H: H<sub>6</sub>,  $J_{6,7}$  = 8.0 Hz, d), 8.52-8.50 (1H: H<sub>19</sub>,  $J_{19,18}$  = 7.5 Hz, d), 9.00-8.99 (1H: H<sub>14</sub>,  $J_{14,15}$  = 2.5 Hz, ad), 10.75 (1H: H<sub>12</sub>, s); <sup>13</sup>C{<sup>1</sup>H}-NMR (125 MHz, DMSO-*d*6): δ<sub>ppm</sub>: 48.32 (C<sub>10</sub>), 51.62 (C<sub>3b</sub>), 51.98 (C<sub>2b</sub>), 90.91 (C<sub>2</sub>), 110.01 (C<sub>9</sub>), 115.92 (C<sub>6</sub>), 116.97 (C<sub>19</sub>), 117.84 (C<sub>3</sub>), 121.74 (C<sub>15</sub>), 122.26 (C<sub>7</sub>), 122.35 (C<sub>17</sub>), 125.29 (C<sub>5a</sub>), 125.56 (C<sub>8</sub>), 126.94 (C<sub>18</sub>), 127.94 (C<sub>16a</sub>), 128.22 (2xC<sub>4</sub><sup>'</sup>), 130.44 (2xC<sub>3</sub><sup>'</sup>), 131.51 (C<sub>4</sub>), 134.25 (C<sub>20</sub>), 136.67 (C<sub>2</sub><sup>'</sup>), 136.85 (C<sub>16</sub>), 137.13 (C<sub>9a</sub>), 137.40 (C<sub>5</sub><sup>'</sup>), 138.22 (C<sub>13a</sub>),

142.02 (C<sub>1a</sub>), 148.98 (C<sub>14</sub>), 161.97 (C<sub>3a</sub>), 164.16 (C<sub>2a</sub>), 166.05 (C<sub>11</sub>), 182.87 (C<sub>1'</sub>). Anal. calcd. C<sub>32</sub>H<sub>23</sub>ClN<sub>4</sub>O<sub>6</sub>: C, 64.60; H, 3.90; N, 9.42; Found: C, 64.70; H, 3.98; N, 9.24.

dimethyl 1-(4-methylbenzoyl)-4-(2-oxo-2-(quinolin-8-ylamino)ethyl)-4*H*-benzo[*d*]pyrrolo[1,2-*a*]imidazole-2,3-dicarboxylate (**6c**)

Yellow powder (precipitated with methanol); mp 195-196 °C; IR (KBr):  $\nu/\text{cm}^{-1}$ : 3300, 3023, 2980, 1735, 1675, 1640, 1310, 1215; <sup>1</sup>H-NMR (500 MHz, CDCl<sub>3</sub>):  $\delta_{\text{ppm}}$ : 2.43 (3H: *p*-CH<sub>3</sub>, s), 3.30 (3H: H<sub>2b</sub>, s), 3.77 (3H: H<sub>3b</sub>, s), 5.84 (2H: H<sub>10</sub>, s), 7.27-7.26 (2H: 2xH<sub>4'</sub>,  $J_{4',3'} = 6.5$  Hz, d), 7.32-7.29 (1H: H<sub>7</sub>,  $J_{7,6} = 8.0$  Hz,  $J_{7,8} = 7.5$  Hz, t), 7.44-7.41 (1H: H<sub>8</sub>,  $J_{8,7} = 7.5$  Hz,  $J_{8,9} = 8.0$  Hz, t), 7.50 (1H: H<sub>15</sub>, bs), 7.56-7.54 (3H: H<sub>9</sub>, H<sub>18</sub>, H<sub>17</sub>, m), 7.72-7.70 (2H: 2xH<sub>3'</sub>,  $J_{3',4'} = 8.0$  Hz, d), 8.24 (1H: H<sub>16</sub>, bs), 8.43-8.41 (1H: H<sub>6</sub>,  $J_{6,7} = 8.5$  Hz, d), 8.75-8.70 (2H: H<sub>14</sub>, H<sub>19</sub>, m), 10.52 (1H: H<sub>12</sub>, bs); <sup>13</sup>C{<sup>1</sup>H}-NMR (125 MHz, CDCl<sub>3</sub>):  $\delta_{\text{ppm}}$ : 21.81 (*p*-CH<sub>3</sub>), 49.66 (C<sub>10</sub>), 51.92 (C<sub>3b</sub>), 52.18 (C<sub>2b</sub>), 91.33 (C<sub>2</sub>), 110.32 (C<sub>9</sub>), 116.84 (C<sub>6</sub>, C<sub>19</sub>), 119.50 (C<sub>3</sub>), 121.75 (C<sub>15</sub>), 122.44 (C<sub>7</sub>), 122.59 (C<sub>17</sub>), 125.45 (C<sub>8</sub>), 126.76 (C<sub>5a</sub>), 127.89 (C<sub>16a</sub>, C<sub>18</sub>), 128.31 (C<sub>20</sub>), 128.93 (2xC<sub>4'</sub>), 129.34 (2xC<sub>3'</sub>), 130.92 (C<sub>4</sub>), 133.54 (C<sub>13a</sub>), 136.52 (C<sub>2'</sub>), 137.19 (C<sub>9a</sub>, C<sub>16</sub>), 142.43 (C<sub>1a</sub>), 142.89 (C<sub>5'</sub>), 147.81 (C<sub>14</sub>), 163.51 (C<sub>3a</sub>), 165.19 (C<sub>2a</sub>), 165.62 (C<sub>11</sub>), 185.17 (C<sub>1'</sub>). Anal. calcd. C<sub>33</sub>H<sub>26</sub>N<sub>4</sub>O<sub>6</sub>: C, 68.98; H, 4.56; N, 9.75; Found: C, 68.88; H, 4.51; N, 9.85.

dimethyl 1-(4-cyanobenzoyl)-4-(2-oxo-2-(quinolin-8-ylamino)ethyl)-4*H*-benzo[*d*]pyrrolo[1,2-*a*]imidazole-2,3-dicarboxylate (**6d**)

Yellow powder (precipitated with methanol); mp 241-243 °C; IR (KBr):  $\nu/\text{cm}^{-1}$ : 3310, 3020, 2946, 2240, 1723, 1678, 1610, 1316, 1220; <sup>1</sup>H-NMR (500 MHz, CDCl<sub>3</sub>):  $\delta_{\text{ppm}}$ : 3.31 (3H: H<sub>2b</sub>, s), 3.77 (3H: H<sub>3b</sub>, s), 5.84 (2H: H<sub>10</sub>, s), 7.37-7.36 (1H: H<sub>7</sub>,  $J = 7.5$  Hz, at), 7.58-7.47 (5H: H<sub>8</sub>, H<sub>9</sub>, H<sub>15</sub>, H<sub>17</sub>, H<sub>18</sub>, m), 7.76-7.75 (2H: 2xH<sub>4'</sub>,  $J_{4',3'} = 7.0$  Hz, d), 7.85-7.83 (2H: 2xH<sub>3'</sub>,  $J_{3',4'} = 7.5$  Hz, d), 8.18 (1H: H<sub>16</sub>, bs), 8.61-8.59 (1H: H<sub>6</sub>,  $J_{6,7} = 8.0$  Hz, d), 8.67-8.66 (1H: H<sub>19</sub>,  $J_{19,18} = 6.0$  Hz, ad), 8.73 (1H: H<sub>14</sub>, bs), 10.38 (1H: H<sub>12</sub>, bs); <sup>13</sup>C{<sup>1</sup>H}-NMR (125 MHz, CDCl<sub>3</sub>):  $\delta_{\text{ppm}}$ : 49.57 (C<sub>10</sub>), 52.15 (C<sub>3b</sub>), 52.37 (C<sub>2b</sub>), 92.56 (C<sub>2</sub>), 110.48 (C<sub>9</sub>), 115.13 (C<sub>5'</sub>), 117.15 (C<sub>6</sub>, C<sub>19</sub>), 118.25 (C<sub>2'</sub>), 118.55 (C<sub>3</sub>), 121.89 (C<sub>15</sub>), 122.55 (C<sub>17</sub>), 122.73 (C<sub>7</sub>), 125.83 (C<sub>8</sub>), 126.80 (C<sub>5a</sub>), 127.56 (C<sub>18</sub>), 128.15 (C<sub>16a</sub>, C<sub>20</sub>), 129.52 (2xC<sub>4'</sub>), 131.94 (2xC<sub>3'</sub>), 132.55 (C<sub>4</sub>), 133.64 (C<sub>13a</sub>), 137.10 (C<sub>9a</sub>, C<sub>16</sub>), 142.69 (C<sub>1a</sub>), 143.09 (*p*-CN), 148.22 (C<sub>14</sub>), 163.16 (C<sub>3a</sub>), 164.87 (C<sub>2a</sub>), 165.06 (C<sub>11</sub>), 182.91 (C<sub>1'</sub>). Anal. calcd. C<sub>33</sub>H<sub>23</sub>N<sub>5</sub>O<sub>6</sub>: C, 67.69; H, 3.96; N, 11.96; Found: C, 67.81; H, 4.01; N, 11.79.

dimethyl 1-(4-fluorobenzoyl)-4-(2-oxo-2-(quinolin-8-ylamino)ethyl)-4*H*-benzo[*d*]pyrrolo[1,2-*a*]imidazole-2,3-dicarboxylate (**6e**)

Yellow powder (precipitated with methanol); mp 195-196 °C; IR (KBr):  $\nu/\text{cm}^{-1}$ : 3281, 3022, 2960, 1745, 1693, 1597, 1233, 1218, 1153; <sup>1</sup>H-NMR (500 MHz, CDCl<sub>3</sub>):  $\delta_{\text{ppm}}$ : 3.36 (3H: H<sub>2b</sub>), 3.77 (3H: H<sub>3b</sub>), 5.79 (2H: H<sub>10</sub>, s), 7.16-7.12 (2H: 2xH<sub>4'</sub>,  $J_{4',3'} = 8.0$  Hz,  $J_{4',F} = 8.5$  Hz, t), 7.34-7.31 (1H: H<sub>7</sub>,  $J = 7.5$  Hz, t), 7.50-7.41 (4H: H<sub>8</sub>, H<sub>15</sub>, H<sub>17</sub>, H<sub>18</sub>, m), 7.56-7.54 (1H: H<sub>9</sub>,  $J_{9,8} = 8.5$  Hz, d), 7.84-7.81 (2H: 2xH<sub>3'</sub>,  $J_{3',4'} = 7.0$  Hz,  $J_{3',F} = 5.5$  Hz, t), 8.14-8.12 (1H: H<sub>16</sub>,  $J_{16,15} = 8.0$  Hz, d), 8.45-8.44 (1H: H<sub>6</sub>,  $J_{6,7} = 8.0$  Hz, d), 8.67-8.66 (1H: H<sub>19</sub>,  $J_{19,18} = 6.0$  Hz, d), 8.706-8.701 (1H: H<sub>14</sub>,  $J_{14,15} = 2.5$  Hz, ad), 10.34 (1H: H<sub>12</sub>, s); <sup>13</sup>C{<sup>1</sup>H}-NMR (125 MHz, CDCl<sub>3</sub>):  $\delta_{\text{ppm}}$ : 49.71 (C<sub>10</sub>), 52.02 (C<sub>3b</sub>), 52.32 (C<sub>2b</sub>), 91.67 (C<sub>2</sub>), 110.42 (C<sub>9</sub>), 115.36 (2xC<sub>4'</sub>,  $J_{C4'-F} = 22.50$  Hz, d), 116.83 (C<sub>6</sub>), 117.05 (C<sub>19</sub>), 119.01 (C<sub>3</sub>), 121.89 (C<sub>15</sub>), 122.41 (C<sub>17</sub>), 122.56 (C<sub>7</sub>), 125.60 (C<sub>8</sub>), 126.71 (C<sub>5a</sub>), 127.35 (C<sub>18</sub>), 128.03 (C<sub>16a</sub>), 131.37 (C<sub>4</sub>), 131.66 (2xC<sub>3'</sub>,  $J_{C3'-F} = 8.75$  Hz, d), 133.86 (C<sub>20</sub>), 135.42 (C<sub>2'</sub>,  $J_{C2'-F} = 2.50$  Hz, d), 136.46 (C<sub>16</sub>), 137.14 (C<sub>9a</sub>), 138.51 (C<sub>13a</sub>), 142.42 (C<sub>1a</sub>), 148.51 (C<sub>14</sub>), 163.41 (C<sub>3a</sub>), 165.11 (C<sub>2a</sub>), 165.18 (C<sub>11</sub>), 165.25 (C<sub>5'</sub>,  $J_{C5'-F} = 252.50$  Hz, d), 183.78 (C<sub>1'</sub>). Anal. calcd. C<sub>32</sub>H<sub>23</sub>FN<sub>4</sub>O<sub>6</sub>: C, 66.43; H, 4.01; N, 9.68; Found: C, 66.53; H, 4.06; N, 9.53.

dimethyl 1-(4-bromobenzoyl)-4-(2-oxo-2-(quinolin-8-ylamino)ethyl)-4*H*-benzo[*d*]pyrrolo[1,2-*a*]imidazole-2,3-dicarboxylate (**6f**)

Yellow powder (precipitated with methanol); mp 204-206 °C; IR (KBr):  $\nu/\text{cm}^{-1}$ : 3326, 3032, 2950, 1730, 1689, 1620, 1299, 1210, 678;  $^1\text{H-NMR}$  (500 MHz,  $\text{CDCl}_3$ ):  $\delta_{\text{ppm}}$ : 3.35 (3H:  $\text{H}_{2\text{b}}$ ), 3.77 (3H:  $\text{H}_{3\text{b}}$ , s), 5.87 (2H:  $\text{H}_{10}$ , s), 7.34-7.31 (1H:  $\text{H}_7$ ,  $J_{7,6} = 8.0$  Hz,  $J_{7,8} = 7.5$  Hz, t), 7.45-7.42 (1H:  $\text{H}_8$ ,  $J_{8,7} = 7.5$  Hz,  $J_{8,9} = 8.0$  Hz, t), 7.57-7.54 (4H:  $\text{H}_9$ ,  $\text{H}_{15}$ ,  $\text{H}_{17}$ ,  $\text{H}_{18}$ , m), 7.61-7.59 (2H:  $2\times\text{H}_{4'}$ ,  $J_{4',3'} = 8.5$  Hz, d), 7.67-7.65 (2H:  $2\times\text{H}_{3'}$ ,  $J_{3',4'} = 8.5$  Hz, d), 8.26 (1H:  $\text{H}_{16}$ , bs), 8.50-8.48 (1H:  $\text{H}_6$ ,  $J_{6,7} = 8.5$  Hz, d), 8.71-8.70 (1H:  $\text{H}_{19}$ ,  $J_{19,18} = 6.0$  Hz, ad), 8.77 (1H:  $\text{H}_{14}$ , bs), 10.54 (1H:  $\text{H}_{12}$ , bs);  $^{13}\text{C}\{^1\text{H}\}$ -NMR (125 MHz,  $\text{CDCl}_3$ ):  $\delta_{\text{ppm}}$ : 49.61 ( $\text{C}_{10}$ ), 52.10 ( $\text{C}_{3\text{b}}$ ), 52.35 ( $\text{C}_{2\text{b}}$ ), 91.88 ( $\text{C}_2$ ), 110.52 ( $\text{C}_9$ ), 116.94 ( $\text{C}_6$ ,  $\text{C}_{19}$ ), 118.92 ( $\text{C}_3$ ), 121.80 ( $\text{C}_{15}$ ), 122.56 ( $\text{C}_7$ ), 122.65 ( $\text{C}_{17}$ ), 125.63 ( $\text{C}_8$ ), 126.74 ( $\text{C}_{5\text{a}}$ ,  $\text{C}_{18}$ ), 126.89 ( $\text{C}_{5'}$ ), 127.88 ( $\text{C}_{16\text{a}}$ ), 128.32 ( $\text{C}_{20}$ ), 130.66 ( $2\times\text{C}_{3'}$ ), 131.47 ( $2\times\text{C}_{4'}$ ), 131.71 ( $\text{C}_4$ ), 137.13 ( $\text{C}_{9\text{a}}$ ,  $\text{C}_{16}$ ), 138.03 ( $\text{C}_{2'}$ ,  $\text{C}_{13\text{a}}$ ), 142.55 ( $\text{C}_{1\text{a}}$ ), 147.77 ( $\text{C}_{14}$ ), 163.33 ( $\text{C}_{3\text{a}}$ ), 165.06 ( $\text{C}_{2\text{a}}$ ), 165.44 ( $\text{C}_{11}$ ), 183.93 ( $\text{C}_{1'}$ ). Anal. calcd.  $\text{C}_{32}\text{H}_{23}\text{BrN}_4\text{O}_6$ : C, 60.10; H, 3.63; N, 8.76; Found: C, 60.20; H, 3.68; N, 8.61.

dimethyl 1-([1,1'-biphenyl]-4-carbonyl)-4-(2-oxo-2-(quinolin-8-ylamino)ethyl)-4*H*-benzo[*d*]pyrrolo[1,2-*a*]imidazole-2,3-dicarboxylate (**6g**)

Yellow powder (precipitated with methanol); mp 175-177 °C; IR (KBr)  $\nu/\text{cm}^{-1}$ : 3320, 3010, 2930, 1736, 1670, 1630, 1310, 1230, 1050;  $^1\text{H-NMR}$  (500 MHz,  $\text{CDCl}_3$ ):  $\delta_{\text{ppm}}$ : 3.31 (3H:  $\text{H}_{2\text{b}}$ , s), 3.77 (3H:  $\text{H}_{3\text{b}}$ , s), 5.86 (2H:  $\text{H}_{10}$ , s), 7.34-7.31 (1H:  $\text{H}_7$ ,  $J_{7,6} = 8.0$  Hz,  $J_{7,8} = 7.5$  Hz, t), 7.53-7.39 (5H:  $\text{H}_8$ ,  $\text{H}_{15}$ ,  $2\times\text{H}_{8'}$ ,  $\text{H}_{9'}$ , m), 7.57-7.56 (3H:  $\text{H}_9$ ,  $\text{H}_{17}$ ,  $\text{H}_{18}$ , m), 7.67-7.65 (2H:  $2\times\text{H}_{7'}$ ,  $J_{7',8'} = 8.5$  Hz, d), 7.71-7.69 (2H:  $2\times\text{H}_{4'}$ ,  $J_{4',3'} = 8.5$  Hz, d), 7.89-7.87 (2H:  $2\times\text{H}_{3'}$ ,  $J_{3',4'} = 8.0$  Hz, d), 8.24 (1H:  $\text{H}_{16}$ , bs), 8.50-8.48 (1H:  $\text{H}_6$ ,  $J_{6,7} = 8.0$  Hz, d), 8.72-8.71 (1H:  $\text{H}_{19}$ ,  $J_{19,18} = 6.5$  Hz,  $J_{19,17} = 2.0$  Hz, add), 8.76-8.75 (1H:  $\text{H}_{14}$ ,  $J_{14,15} = 3.5$  Hz, ad), 10.53 (1H:  $\text{H}_{12}$ , bs);  $^{13}\text{C}\{^1\text{H}\}$ -NMR (125 MHz,  $\text{CDCl}_3$ ):  $\delta_{\text{ppm}}$ : 49.62 ( $\text{C}_{10}$ ), 51.97 ( $\text{C}_{3\text{b}}$ ), 52.25 ( $\text{C}_{2\text{b}}$ ), 91.59 ( $\text{C}_2$ ), 110.53 ( $\text{C}_9$ ), 116.92 ( $\text{C}_6$ ,  $\text{C}_{19}$ ), 119.41 ( $\text{C}_3$ ), 121.75 ( $\text{C}_{15}$ ), 122.50 ( $\text{C}_7$ ), 122.63 ( $\text{C}_{17}$ ), 125.53 ( $\text{C}_8$ ), 126.79 ( $\text{C}_{5\text{a}}$ ,  $\text{C}_{18}$ ), 126.87 ( $2\times\text{C}_{7'}$ ), 127.38 ( $2\times\text{C}_{8'}$ ), 128.26 ( $\text{C}_{16\text{a}}$ ,  $\text{C}_{20}$ ), 129.12 ( $2\times\text{C}_{4'}$ ,  $\text{C}_{9'}$ ), 129.77 ( $2\times\text{C}_{3'}$ ), 131.34 ( $\text{C}_4$ ), 137.18 ( $\text{C}_{9\text{a}}$ ,  $\text{C}_{16}$ ), 137.98 ( $\text{C}_{2'}$ ), 140.19 ( $\text{C}_6$ ,  $\text{C}_{13\text{a}}$ ), 142.52 ( $\text{C}_{1\text{a}}$ ), 144.90 ( $\text{C}_{5'}$ ), 147.71 ( $\text{C}_{14}$ ), 163.47 ( $\text{C}_{3\text{a}}$ ), 165.17 ( $\text{C}_{2\text{a}}$ ), 165.61 ( $\text{C}_{11}$ ), 184.86 ( $\text{C}_{1'}$ ). Anal. calcd.  $\text{C}_{38}\text{H}_{28}\text{N}_4\text{O}_6$ : C, 71.69; H, 4.43; N, 8.80; Found: C, 71.80; H, 4.48; N, 8.64.

dimethyl 1-benzoyl-4-(2-oxo-2-(quinolin-8-ylamino)ethyl)-4*H*-benzo[*d*]pyrrolo[1,2-*a*]imidazole-2,3-dicarboxylate (**6h**)

Yellow powder (precipitated with methanol); mp 190-193 °C; IR (KBr)  $\nu/\text{cm}^{-1}$ : 3320, 3010, 2920, 1740, 1667, 1610, 1310, 1292;  $^1\text{H-NMR}$  (500 MHz,  $\text{CDCl}_3$ ):  $\delta_{\text{ppm}}$ : 3.27 (3H:  $\text{H}_{2\text{b}}$ , s), 3.77 (3H:  $\text{H}_{3\text{b}}$ , s), 5.81 (2H:  $\text{H}_{10}$ , s), 7.34-7.31 (1H:  $\text{H}_7$ ,  $J_{7,6} = 8.0$  Hz,  $J_{7,8} = 7.5$  Hz, t), 7.56-7.42 (8H:  $2\times\text{H}_{4'}$ ,  $\text{H}_{5'}$ ,  $\text{H}_8$ ,  $\text{H}_9$ ,  $\text{H}_{15}$ ,  $\text{H}_{17}$ ,  $\text{H}_{18}$ , m), 7.80-7.78 (2H:  $2\times\text{H}_{3'}$ ,  $J_{3',4'} = 8.0$  Hz, d), 8.16-8.14 (1H:  $\text{H}_{16}$ ,  $J_{16,15} = 8.0$  Hz, d), 8.50-8.48 (1H:  $\text{H}_6$ ,  $J_{6,7} = 8.5$  Hz, d), 8.69-8.67 (1H:  $\text{H}_{19}$ ,  $J_{19,18} = 7.0$  Hz,  $J_{19,17} = 2.0$  Hz, dd), 8.714-8.710 (1H:  $\text{H}_{14}$ ,  $J_{14,15} = 2.0$  Hz, ad), 10.38 (1H:  $\text{H}_{12}$ , bs);  $^{13}\text{C}\{^1\text{H}\}$ -NMR (125 MHz,  $\text{CDCl}_3$ ):  $\delta_{\text{ppm}}$ : 49.69 ( $\text{C}_{10}$ ), 51.99 ( $\text{C}_{3\text{b}}$ ), 52.18 ( $\text{C}_{2\text{b}}$ ), 91.59 ( $\text{C}_2$ ), 110.38 ( $\text{C}_9$ ), 116.95 ( $\text{C}_6$ ,  $\text{C}_{19}$ ), 119.36 ( $\text{C}_3$ ), 121.81 ( $\text{C}_{15}$ ), 122.50 ( $\text{C}_7$ ,  $\text{C}_{17}$ ), 125.53 ( $\text{C}_8$ ), 126.80 ( $\text{C}_{18}$ ), 127.60 ( $\text{C}_{16\text{a}}$ ), 128.24 ( $2\times\text{C}_{4'}$ ), 129.13 ( $2\times\text{C}_{3'}$ ), 131.46 ( $\text{C}_4$ ), 132.14 ( $\text{C}_{5'}$ ), 133.60 ( $\text{C}_{20}$ ), 137.15 ( $\text{C}_{2'}$ ,  $\text{C}_{9\text{a}}$ ,  $\text{C}_{16}$ ), 139.20 ( $\text{C}_{13\text{a}}$ ), 142.46 ( $\text{C}_{1\text{a}}$ ), 148.10 ( $\text{C}_{14}$ ), 163.45 ( $\text{C}_{3\text{a}}$ ), 165.08 ( $\text{C}_{2\text{a}}$ ), 165.26 ( $\text{C}_{11}$ ), 185.28 ( $\text{C}_{1'}$ ). Anal. calcd.  $\text{C}_{32}\text{H}_{24}\text{N}_4\text{O}_6$ : C, 68.56; H, 4.32; N, 9.99; Found: C, 68.66; H, 4.38; N, 9.82.

dimethyl 1-(4-methoxybenzoyl)-4-(2-oxo-2-(quinolin-8-ylamino)ethyl)-4*H*-benzo[*d*]pyrrolo[1,2-*a*]imidazole-2,3-dicarboxylate (**6i**)

Yellow powder (precipitated with methanol); mp 193-195 °C; IR (KBr):  $\nu/\text{cm}^{-1}$ : 3313, 3005, 2971, 1738, 1574, 1376, 1213, 1030;  $^1\text{H-NMR}$  (500 MHz,  $\text{CDCl}_3$ ):  $\delta_{\text{ppm}}$ : 3.37 (3H: *p*- $\text{OCH}_3$ , s), 3.77 (3H:  $\text{H}_{2\text{b}}$ , s), 3.88 (3H:  $\text{H}_{3\text{b}}$ , s), 5.78 (2H:  $\text{H}_{10}$ , s), 6.96-6.94 (2H:  $2\times\text{H}_{4'}$ ,  $J_{4',3'} = 8.5$  Hz, d), 7.30-7.27 (1H:  $\text{H}_7$ ,  $J_{7,6} = 8.0$  Hz,  $J_{7,8} = 7.5$  Hz, t), 7.43-7.40 (2H:  $\text{H}_8$ ,  $\text{H}_{15}$ , m), 7.54-7.49 (3H:  $\text{H}_9$ ,  $\text{H}_{17}$ ,  $\text{H}_{18}$ , m), 7.83-7.81 (2H:  $2\times\text{H}_{3'}$ ,  $J_{3',4'} = 8.5$  Hz, d), 8.13-8.11 (1H:  $\text{H}_{16}$ ,  $J_{16,15} = 7.5$  Hz, d), 8.34-8.32 (1H:  $\text{H}_6$ ,  $J_{6,7} = 8.5$  Hz, d), 8.69-8.66 (2H:  $\text{H}_{14}$ ,  $\text{H}_{19}$ , m), 10.36 (1H:  $\text{H}_{12}$ , s);  $^{13}\text{C}\{^1\text{H}\}$ -NMR (125 MHz,  $\text{CDCl}_3$ ):  $\delta_{\text{ppm}}$ : 49.80 ( $\text{C}_{10}$ ), 51.92 ( $\text{C}_{2\text{b}}$ ), 52.30 (*p*-

OCH<sub>3</sub>), 55.64 (C<sub>3b</sub>), 91.08 (C<sub>2</sub>), 110.36 (C<sub>9</sub>), 113.58 (2xC<sub>4'</sub>), 116.63 (C<sub>6</sub>), 117.02 (C<sub>19</sub>), 119.41 (C<sub>3</sub>), 121.86 (C<sub>15</sub>), 122.36 (C<sub>17</sub>), 122.43 (C<sub>7</sub>), 125.43 (C<sub>8</sub>), 126.66 (C<sub>5a</sub>), 127.32 (C<sub>18</sub>), 128.01 (C<sub>16a</sub>), 130.30 (C<sub>4</sub>), 131.52 (2xC<sub>3'</sub>), 131.76 (C<sub>2'</sub>), 133.90 (C<sub>20</sub>), 136.41 (C<sub>16</sub>), 137.19 (C<sub>9a</sub>), 138.52 (C<sub>13a</sub>), 142.26 (C<sub>1a</sub>), 148.51 (C<sub>14</sub>), 163.20 (C<sub>5'</sub>), 163.58 (C<sub>11</sub>), 165.28 (C<sub>3a</sub>), 165.35 (C<sub>2a</sub>), 184.28 (C<sub>1'</sub>). Anal. calcd. C<sub>33</sub>H<sub>26</sub>N<sub>4</sub>O<sub>7</sub>: C, 67.11; H, 4.44; N, 9.49; Found: C, 67.22; H, 4.49; N, 9.32.

dimethyl 4-hydroxy-4-(4-nitrophenyl)-5-(2-oxo-2-(quinolin-8-ylamino)ethyl)-4,5-dihydropyrrolo[1,2-*a*]quinoxaline-2,3-dicarboxylate (**7a**)

Yellowish powder (precipitated with ethyl acetate/*n*-hexan); mp 184-186 °C; IR (KBr):  $\nu/\text{cm}^{-1}$ : 3267, 3214, 3015, 2974, 1718, 1667, 1538, 1329, 1236, 1081; <sup>1</sup>H-NMR (500 MHz, CDCl<sub>3</sub>):  $\delta_{\text{ppm}}$ : 3.61 (3H: H<sub>2b</sub>, s), 3.85 (3H: H<sub>3b</sub>, s), 3.91-3.88 (1H: H<sub>10b</sub>,  $J_{10b,10a}$  = 17.5 Hz, d), 4.36-4.33 (1H: H<sub>10a</sub>,  $J_{10a,10b}$  = 17.5 Hz, d), 6.95-6.94 (1H: H<sub>6</sub>,  $J_{6,7}$  = 8.0 Hz, d), 7.01-6.98 (1H: H<sub>8</sub>,  $J$  = 7.5 Hz, t), 7.21-7.18 (1H: H<sub>7</sub>,  $J$  = 8.0 Hz, t), 7.41-7.39 (1H: H<sub>15</sub>, m), 7.50-7.46 (3H: 2xH<sub>2'</sub>, H<sub>18</sub>, m), 7.60-7.55 (2H: H<sub>9</sub>, -OH, m), 7.68-7.66 (1H: H<sub>17</sub>,  $J_{17,18}$  = 9.0 Hz, d), 7.92 (1H: H<sub>1</sub>, s), 8.17-8.11 (3H: H<sub>16</sub>, 2xH<sub>2'</sub>, m), 8.68-8.63 (2H: H<sub>14</sub>, H<sub>19</sub>, m), 10.75 (1H: H<sub>12</sub>, s). <sup>13</sup>C{<sup>1</sup>H}-NMR (125 MHz, CDCl<sub>3</sub>):  $\delta_{\text{ppm}}$ : 50.39 (C<sub>10</sub>), 51.96 (C<sub>2b</sub>), 52.50 (C<sub>3b</sub>), 84.75 (C<sub>4</sub>), 113.5 (C<sub>2</sub>), 114.26 (C<sub>8</sub>), 115.44 (C<sub>9</sub>), 117.10 (C<sub>19</sub>), 117.64 (C<sub>3a</sub>), 119.05 (C<sub>1</sub>), 120.21 (C<sub>6</sub>), 121.74 (C<sub>15</sub>), 122.34 (C<sub>17</sub>), 122.46 (C<sub>9a</sub>), 123.77 (2xC<sub>3'</sub>), 127.30 (C<sub>7</sub>), 128.06 (C<sub>18</sub>), 128.65 (2xC<sub>2'</sub>), 130.55 (C<sub>16a</sub>), 133.41 (C<sub>3</sub>), 133.87 (C<sub>5a</sub>), 134.06 (C<sub>20</sub>), 136.29 (C<sub>16</sub>), 138.84 (C<sub>13a</sub>), 143.14 (C<sub>1'</sub>), 146.21 (C<sub>4'</sub>), 148.75 (C<sub>14</sub>), 163.73 (C<sub>3'a</sub>), 166.42 (C<sub>2'a</sub>), 168.95 (C<sub>11</sub>). Anal. calcd. C<sub>32</sub>H<sub>25</sub>N<sub>5</sub>O<sub>8</sub>: C, 63.26; H, 4.15; N, 11.53; Found: C, 63.34; H, 4.09; N, 11.58.

dimethyl 4-(4-chlorophenyl)-4-hydroxy-5-(2-oxo-2-(quinolin-8-ylamino)ethyl)-4,5-dihydropyrrolo[1,2-*a*]quinoxaline-2,3-dicarboxylate (**7b**)

Pale pink powder (precipitated with ethyl acetate/*n*-hexan); mp 179-180°C; IR (KBr):  $\nu/\text{cm}^{-1}$ : 3265, 3209, 3017, 2944, 1716, 1658, 1533, 1237, 1074, 824; <sup>1</sup>H-NMR (500 MHz, CDCl<sub>3</sub>):  $\delta_{\text{ppm}}$ : 3.57 (3H: H<sub>2b</sub>, s), 3.84 (3H: H<sub>3b</sub>, s), 3.94-3.90 (1H: H<sub>10b</sub>,  $J_{10b,10a}$  = 17.5 Hz, d), 4.34-4.30 (1H: H<sub>10a</sub>,  $J_{10a,10b}$  = 17.5 Hz, d), 6.98-6.92 (2H: H<sub>6</sub>, H<sub>8</sub>, m), 7.18-7.15 (1H: H<sub>7</sub>,  $J$  = 7.5 Hz, t), 7.26-7.24 (3H: 2xH<sub>3'</sub>, H<sub>18</sub>, m), 7.39-7.37 (1H: H<sub>15</sub>, m), 7.51-7.47 (4H: 2xH<sub>2'</sub>, H<sub>17</sub>, -OH, m), 7.54-7.52 (1H: H<sub>9</sub>,  $J_{9,8}$  = 8.0 Hz, d), 7.90 (1H: H<sub>1</sub>, s), 8.11-8.09 (1H: H<sub>16</sub>,  $J_{16,15}$  = 8.5 Hz,  $J_{16,14}$  = 1.5 Hz, dd), 8.67-8.65 (2H: H<sub>14</sub>, H<sub>19</sub>, m), 10.71 (1H: H<sub>12</sub>, s). <sup>13</sup>C{<sup>1</sup>H}-NMR (125 MHz, CDCl<sub>3</sub>):  $\delta_{\text{ppm}}$ : 50.42 (C<sub>10</sub>), 51.98 (C<sub>2b</sub>), 52.49 (C<sub>3b</sub>), 84.68 (C<sub>4</sub>), 113.58 (C<sub>2</sub>), 114.28 (C<sub>8</sub>), 115.40 (C<sub>9</sub>), 117.10 (C<sub>19</sub>), 117.64 (C<sub>3a</sub>), 118.32 (C<sub>1</sub>), 120.18 (C<sub>6</sub>), 121.77 (C<sub>15</sub>), 122.29 (C<sub>17</sub>), 122.46 (C<sub>9a</sub>), 127.29 (C<sub>7</sub>), 128.08 (C<sub>18</sub>), 128.19 (2xC<sub>2'</sub>), 128.97 (2xC<sub>3'</sub>), 130.56 (C<sub>16a</sub>), 133.42 (C<sub>3</sub>), 133.88 (C<sub>5a</sub>), 134.00 (C<sub>20</sub>), 134.89 (C<sub>4'</sub>), 136.35 (C<sub>16</sub>), 138.85 (C<sub>13a</sub>), 140.63 (C<sub>1'</sub>), 148.74 (C<sub>14</sub>), 163.75 (C<sub>3'a</sub>), 166.28 (C<sub>2'a</sub>), 168.92 (C<sub>11</sub>). Anal. calcd. C<sub>32</sub>H<sub>25</sub>ClN<sub>4</sub>O<sub>6</sub>: C, 64.38; H, 4.22; N, 9.38; Found: C, 64.31; H, 4.30; N, 9.42.

dimethyl 4-(4-cyanophenyl)-4-hydroxy-5-(2-oxo-2-(quinolin-8-ylamino)ethyl)-4,5-dihydropyrrolo[1,2-*a*]quinoxaline-2,3-dicarboxylate (**7d**)

Beige powder (precipitated with ethyl acetate/*n*-hexan); mp 150-154°C; IR (KBr):  $\nu/\text{cm}^{-1}$ : 3217, 3200, 3003, 2952, 2229, 1713, 1537, 1228, 1061; <sup>1</sup>H-NMR (500 MHz, CDCl<sub>3</sub>):  $\delta_{\text{ppm}}$ : 3.60 (3H: H<sub>2b</sub>, s), 3.85 (3H: H<sub>3b</sub>, s), 3.94-3.91 (1H: H<sub>10b</sub>,  $J_{10b,10a}$  = 17.5 Hz, d), 4.32-4.29 (1H: H<sub>10a</sub>,  $J_{10a,10b}$  = 17.5 Hz, d), 6.94-6.93 (1H: H<sub>6</sub>,  $J_{6,7}$  = 8.0 Hz, d), 7.00-6.97 (1H: H<sub>8</sub>,  $J$  = 8.5 Hz, t), 7.20-7.17 (1H: H<sub>7</sub>,  $J$  = 8.5 Hz, t), 7.41-7.38 (1H: H<sub>15</sub>, m), 7.50-7.49 (2H: 2xH<sub>3'</sub>,  $J_{3',2'}$  = 6.5 Hz, d), 7.58-7.54 (4H: 2xH<sub>2'</sub>, H<sub>9</sub>, H<sub>18</sub>, m), 7.64-7.62 (2H: H<sub>17</sub>, -OH,  $J_{17,18}$  = 8.5 Hz, ad), 7.91 (1H: H<sub>1</sub>, s), 8.12-8.10 (1H: H<sub>16</sub>,  $J_{16,15}$  = 8.0 Hz,  $J_{16,14}$  = 1.5 Hz, dd), 8.67-8.64 (2H: H<sub>14</sub>, H<sub>19</sub>, m), 10.74 (1H: H<sub>12</sub>, s). <sup>13</sup>C{<sup>1</sup>H}-NMR (125 MHz, CDCl<sub>3</sub>):  $\delta_{\text{ppm}}$ : 51.02 (C<sub>10</sub>), 51.94 (C<sub>2b</sub>), 52.65 (C<sub>3b</sub>), 84.75 (C<sub>4</sub>), 111.89 (C<sub>4'</sub>), 113.63 (C<sub>2</sub>), 114.22 (C<sub>8</sub>), 115.44 (C<sub>9</sub>), 117.16 (C<sub>19</sub>), 117.65 (C<sub>3a</sub>), 118.45 (C<sub>1</sub>), 120.17 (C<sub>6</sub>), 121.78 (C<sub>15</sub>), 122.17 (C<sub>17</sub>), 122.45 (C<sub>9a</sub>), 127.16 (C<sub>7</sub>), 128.09 (C<sub>18</sub>), 128.24 (2xC<sub>2'</sub>), 130.56 (C<sub>16a</sub>), 132.09 (2xC<sub>3'</sub>), 133.50 (C<sub>3</sub>), 133.88 (C<sub>5a</sub>), 134.09 (C<sub>20</sub>), 136.35

(C<sub>16</sub>), 138.85 (C<sub>13a</sub>), 141.40 (C<sub>1'</sub>), 148.70 (C<sub>14</sub>), 163.67 (C<sub>3'a</sub>), 166.85 (C<sub>2'a</sub>), 168.50 (C<sub>11</sub>). Anal. calcd. C<sub>33</sub>H<sub>25</sub>N<sub>5</sub>O<sub>6</sub>: C, 67.46; H, 4.29; N, 11.92; Found: C, 67.35; H, 4.21; N, 11.84.

dimethyl 4-(4-fluorophenyl)-4-hydroxy-5-(2-oxo-2-(quinolin-8-ylamino)ethyl)-4,5-dihydropyrrolo[1,2-*a*]quinoxaline-2,3-dicarboxylate (**7e**)

Beige powder (precipitated with ethyl acetate/*n*-hexan); mp 189-191 °C; IR (KBr):  $\nu/\text{cm}^{-1}$ : 3291, 3196, 3052, 2987, 1705, 1543, 1324, 1233, 1160; <sup>1</sup>H-NMR (500 MHz, CDCl<sub>3</sub>):  $\delta_{\text{ppm}}$ : 3.54 (3H: H<sub>2b</sub>, s), 3.81 (3H: H<sub>3b</sub>, s), 3.95-3.92 (1H: H<sub>10b</sub>,  $J_{10b,10a}$  = 17.5 Hz, d), 4.33-4.30 (1H: H<sub>10a</sub>,  $J_{10a,10b}$  = 17.5 Hz, d), 6.97-6.92 (2H: H<sub>6</sub>, H<sub>8</sub>, m), 7.18-7.15 (1H: H<sub>7</sub>,  $J$  = 8.5 Hz, t), 7.22-7.20 (2H: 2xH<sub>3'</sub>,  $J_{3',2'}$  = 6.5 Hz, d), 7.40-7.36 (3H: H<sub>15</sub>, 2xH<sub>2'</sub>, m), 7.58-7.56 (2H: H<sub>9</sub>, H<sub>18</sub>, m), 7.66-7.63 (2H: H<sub>17</sub>, -OH, m), 7.90 (1H: H<sub>1</sub>, s), 8.15-8.13 (1H: H<sub>16</sub>,  $J_{16,15}$  = 8.0 Hz, d), 8.69-8.66 (2H: H<sub>14</sub>, H<sub>19</sub>, m), 10.72 (1H: H<sub>12</sub>, s). <sup>13</sup>C{<sup>1</sup>H}-NMR (125 MHz, CDCl<sub>3</sub>):  $\delta_{\text{ppm}}$ : 51.26 (C<sub>10</sub>), 52.03 (C<sub>2b</sub>), 52.65 (C<sub>3b</sub>), 84.88 (C<sub>4</sub>), 113.63 (C<sub>2</sub>), 114.26 (C<sub>8</sub>), 115.39 (C<sub>9</sub>), 115.96 (2xC<sub>3'</sub>,  $J_{C3'-F}$  = 22.1 Hz, d), 117.22 (C<sub>19</sub>), 117.65 (C<sub>3a</sub>), 119.03 (C<sub>1</sub>), 120.13 (C<sub>6</sub>), 121.80 (C<sub>15</sub>), 122.15 (C<sub>17</sub>), 122.45 (C<sub>9a</sub>), 127.20 (C<sub>7</sub>), 128.10 (C<sub>18</sub>), 128.71 (2x C<sub>2'</sub>,  $J_{C2'-F}$  = 8.1 Hz, d), 130.56 (C<sub>16a</sub>), 133.51 (C<sub>3</sub>), 133.87 (C<sub>5a</sub>), 134.16 (C<sub>20</sub>), 135.80 (C<sub>1'</sub>,  $J_{C1'-F}$  = 2.4 Hz, d), 136.32 (C<sub>16</sub>), 138.84 (C<sub>13a</sub>), 148.70 (C<sub>14</sub>), 161.20 (C<sub>4'</sub>,  $J_{C4'-F}$  = 244.5 Hz, d), 163.70 (C<sub>3'a</sub>), 167.01 (C<sub>2'a</sub>), 168.54 (C<sub>11</sub>). Anal. calcd. C<sub>32</sub>H<sub>25</sub>FN<sub>4</sub>O<sub>6</sub>: C, 66.20; H, 4.34; N, 9.65; Found: C, 66.29; H, 4.26; N, 9.71.

dimethyl 4-(4-bromophenyl)-4-hydroxy-5-(2-oxo-2-(quinolin-8-ylamino)ethyl)-4,5-dihydropyrrolo[1,2-*a*]quinoxaline-2,3-dicarboxylate (**7f**)

Peach powder (precipitated with ethyl acetate/*n*-hexan); mp 177-179°C; IR (KBr):  $\nu/\text{cm}^{-1}$ : 3272, 3201, 3012, 2948, 1716, 1658, 1533, 1237, 1074, 675; <sup>1</sup>H-NMR (500 MHz, CDCl<sub>3</sub>):  $\delta_{\text{ppm}}$ : 3.56 (3H: H<sub>2b</sub>, s), 3.83 (3H: H<sub>3b</sub>, s), 3.94-3.92 (1H: H<sub>10b</sub>,  $J_{10b,10a}$  = 17.5 Hz, d), 4.33-4.30 (1H: H<sub>10a</sub>,  $J_{10a,10b}$  = 17.5 Hz, d), 6.97-6.91 (2H: H<sub>6</sub>, H<sub>8</sub>, m), 7.17-7.14 (1H: H<sub>7</sub>,  $J$  = 8.0 Hz, t), 7.39-7.37 (1H: H<sub>15</sub>, m), 7.43-7.41 (4H: 2xH<sub>3'</sub>, H<sub>18</sub>, -OH, m), 7.49-7.48 (3H: 2xH<sub>2'</sub>, H<sub>17</sub>, m), 7.53-7.51 (1H: H<sub>9</sub>,  $J_{9,8}$  = 8.0 Hz, d), 7.89 (1H: H<sub>1</sub>, s), 8.10-8.09 (1H: H<sub>16</sub>,  $J_{16,15}$  = 8.0 Hz, d), 8.67-8.64 (2H: H<sub>14</sub>, H<sub>19</sub>, m), 10.71 (1H: H<sub>12</sub>, s). <sup>13</sup>C{<sup>1</sup>H}-NMR (125 MHz, CDCl<sub>3</sub>):  $\delta_{\text{ppm}}$ : 50.43 (C<sub>10</sub>), 51.97 (C<sub>2b</sub>), 52.50 (C<sub>3b</sub>), 84.71 (C<sub>4</sub>), 113.57 (C<sub>2</sub>), 114.28 (C<sub>8</sub>), 115.40 (C<sub>9</sub>), 117.08 (C<sub>19</sub>), 117.60 (C<sub>3a</sub>), 118.31 (C<sub>1</sub>), 120.19 (C<sub>6</sub>), 121.76 (C<sub>15</sub>), 122.29 (C<sub>17</sub>), 122.46 (C<sub>9a</sub>), 123.15 (C<sub>4'</sub>), 127.27 (C<sub>7</sub>), 128.05 (C<sub>18</sub>), 128.50 (2xC<sub>2'</sub>), 130.58 (C<sub>16a</sub>), 131.51 (2xC<sub>3'</sub>), 133.28 (C<sub>3</sub>), 133.84 (C<sub>5a</sub>), 133.97 (C<sub>20</sub>), 136.33 (C<sub>16</sub>), 141.10 (C<sub>13a</sub>), 138.82 (C<sub>1'</sub>), 148.73 (C<sub>14</sub>), 163.73 (C<sub>3'a</sub>), 166.24 (C<sub>2'a</sub>), 168.90 (C<sub>11</sub>). Anal. calcd. C<sub>32</sub>H<sub>25</sub>BrN<sub>4</sub>O<sub>6</sub>: C, 59.92; H, 3.93; N, 8.73; Found: C, 60.02; H, 3.95; N, 8.80.

For each series of compounds a representative was chosen (3a-i → **3f**, 3'a-i → **3'd**, 5a-i → **5i**, 6a-i → **6e**, 7a-i → **7b**), whose NMR spectrum is presented.

## **NMR Spectra of compounds**



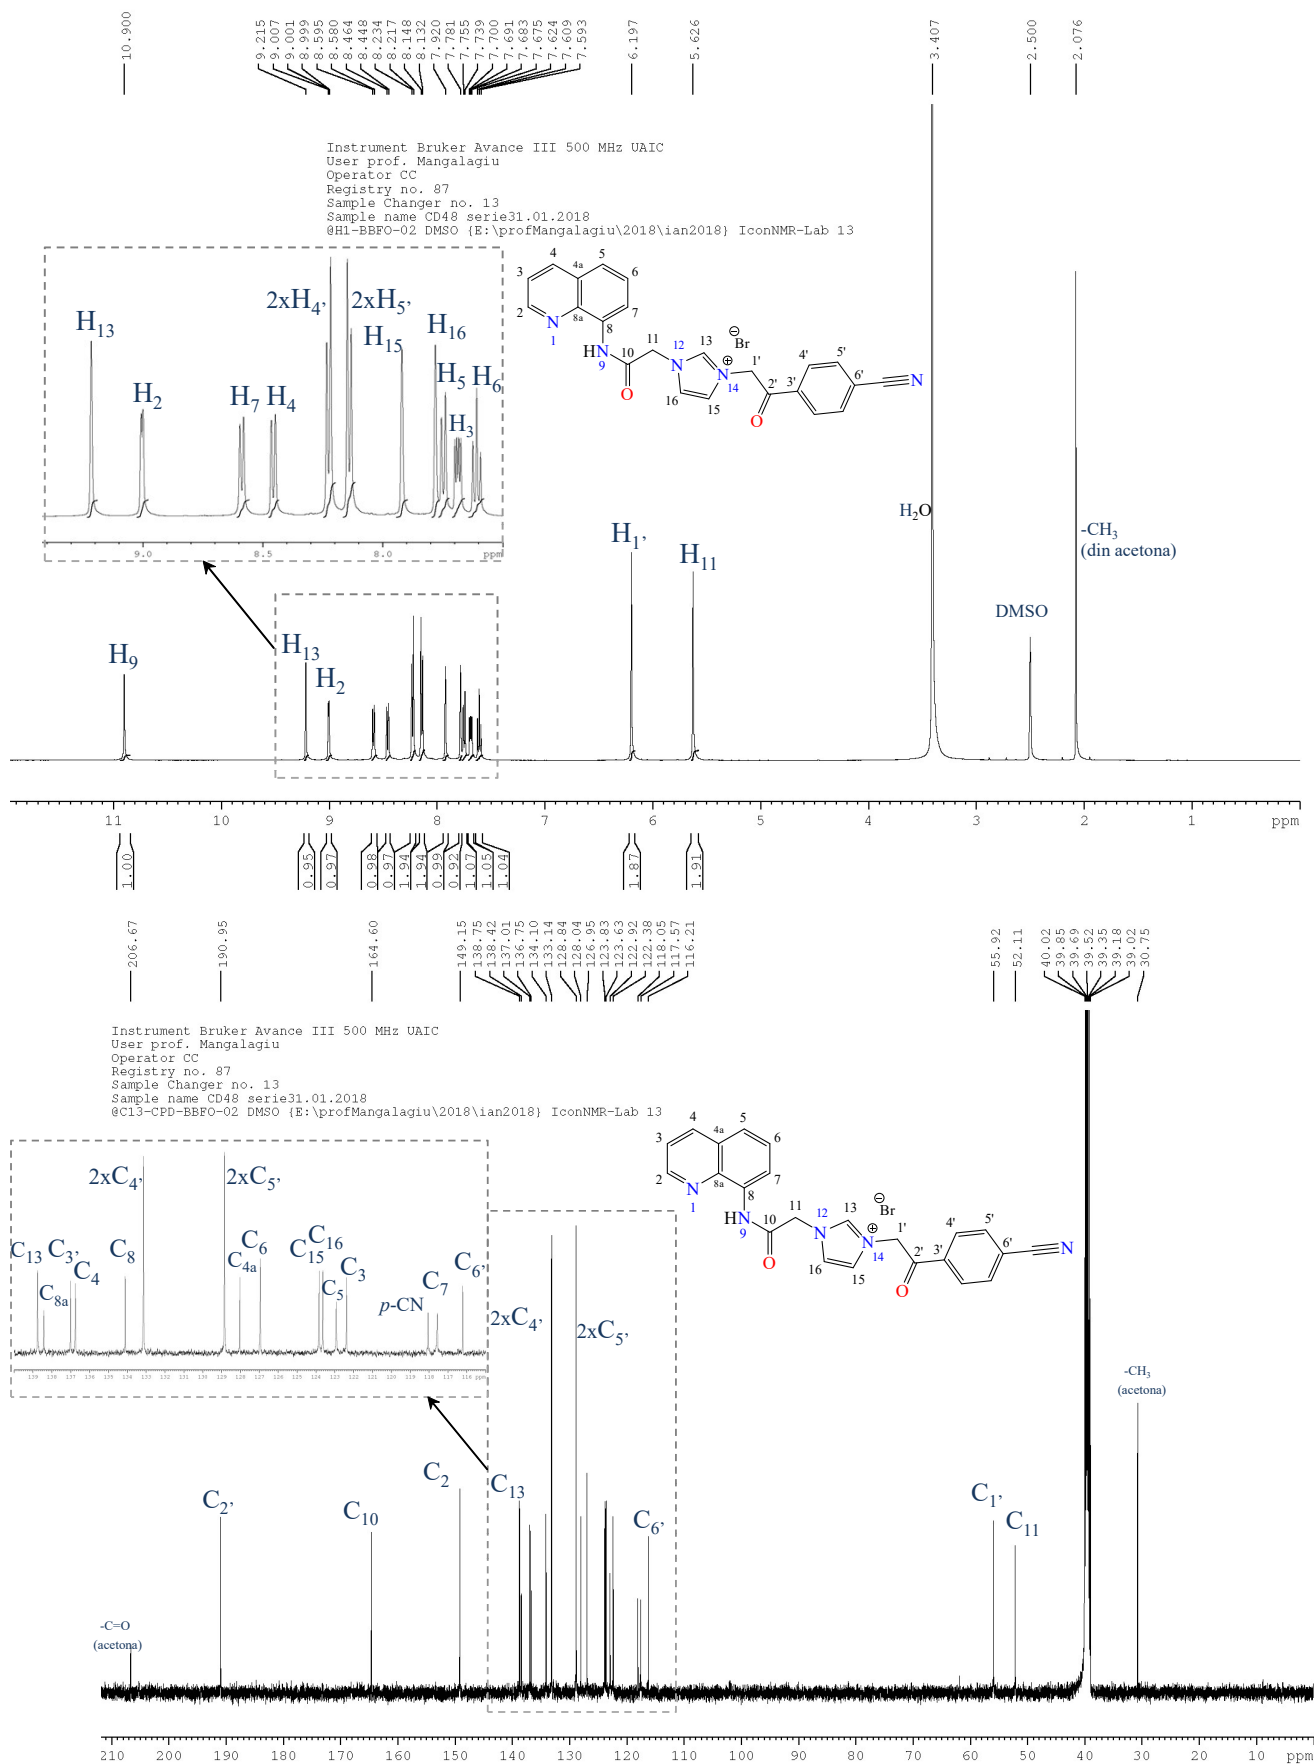

Figure 1. <sup>1</sup>H-NMR and <sup>13</sup>C{<sup>1</sup>H}-NMR Spectra for compound 3'd.

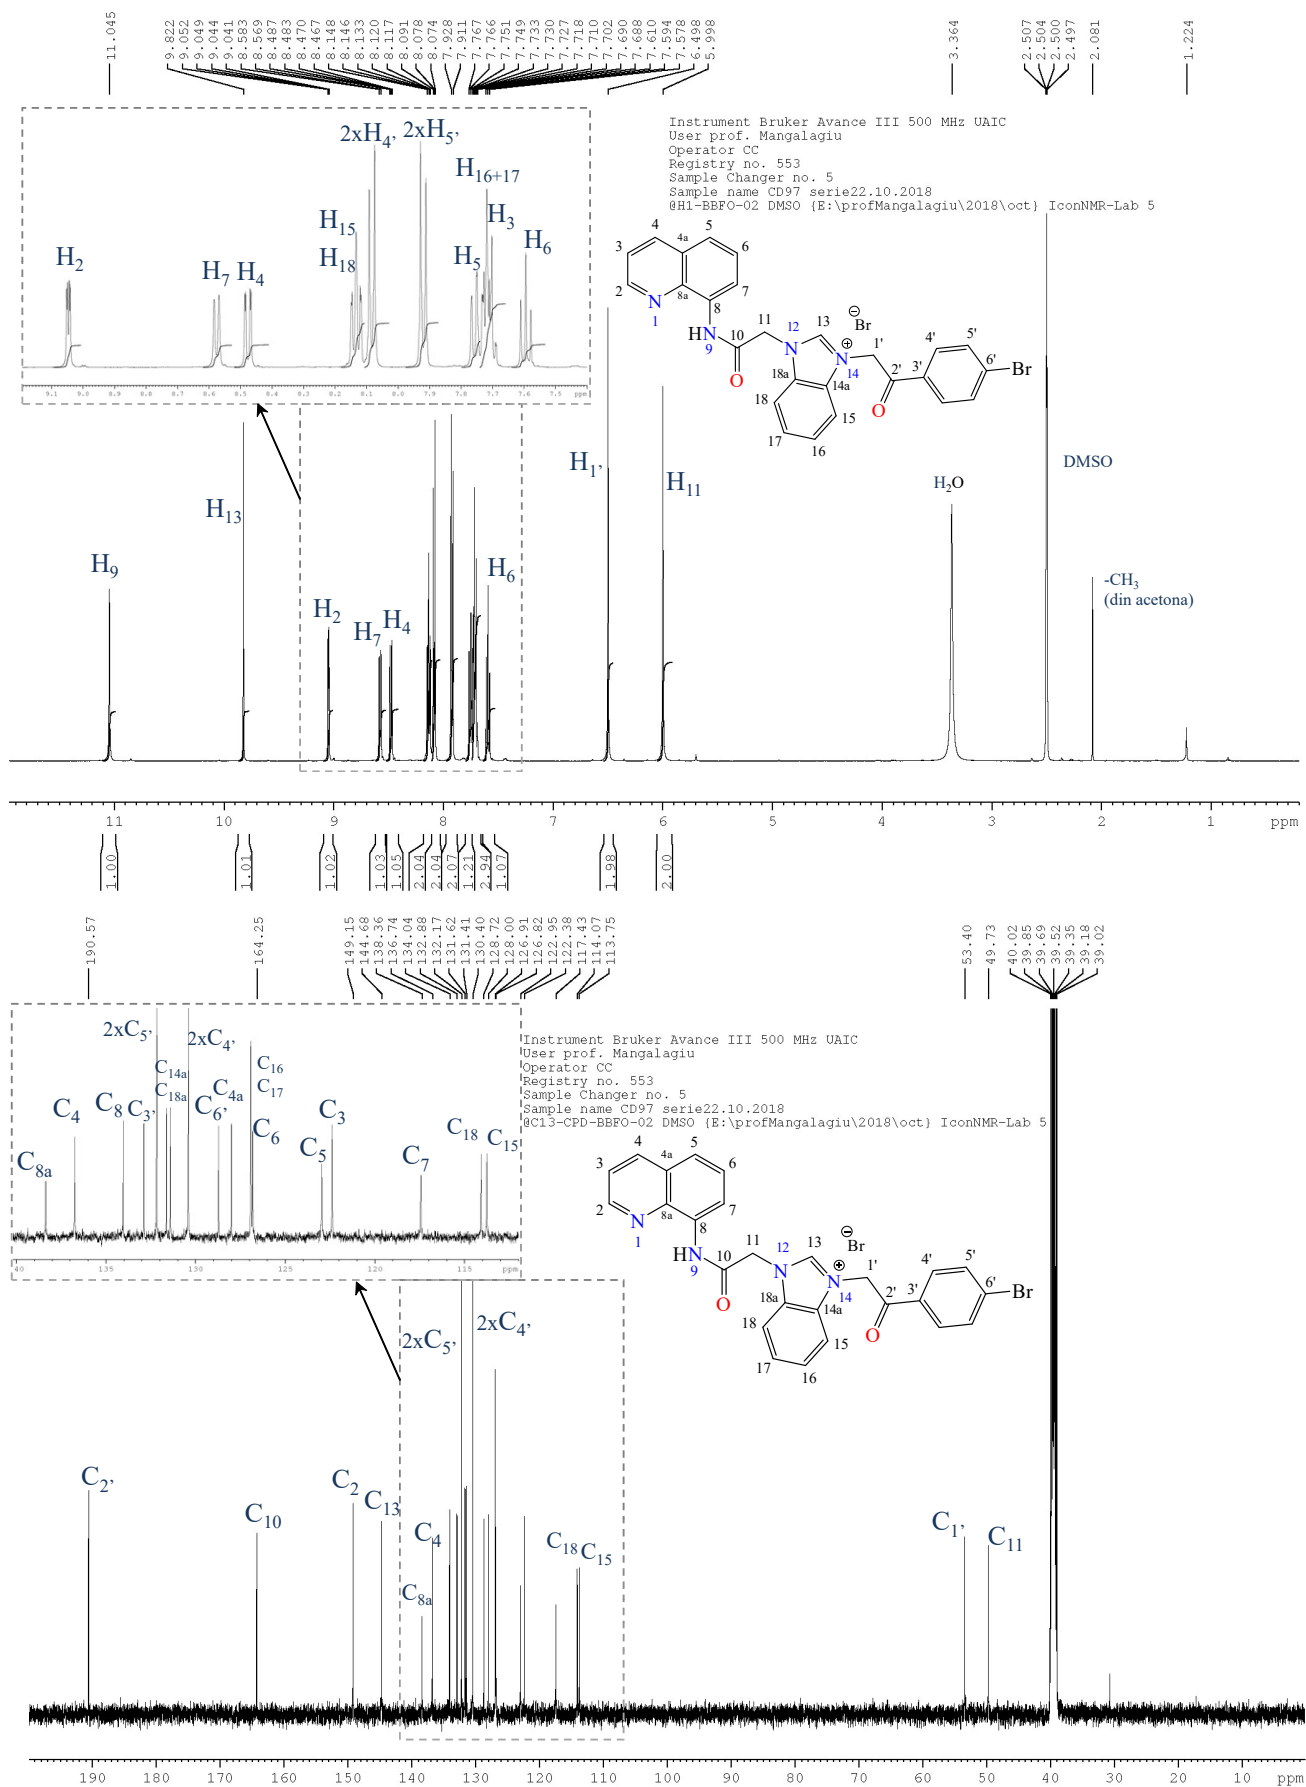

Figure 2. <sup>1</sup>H-NMR and <sup>13</sup>C{<sup>1</sup>H}-NMR Spectra for compound 3f.

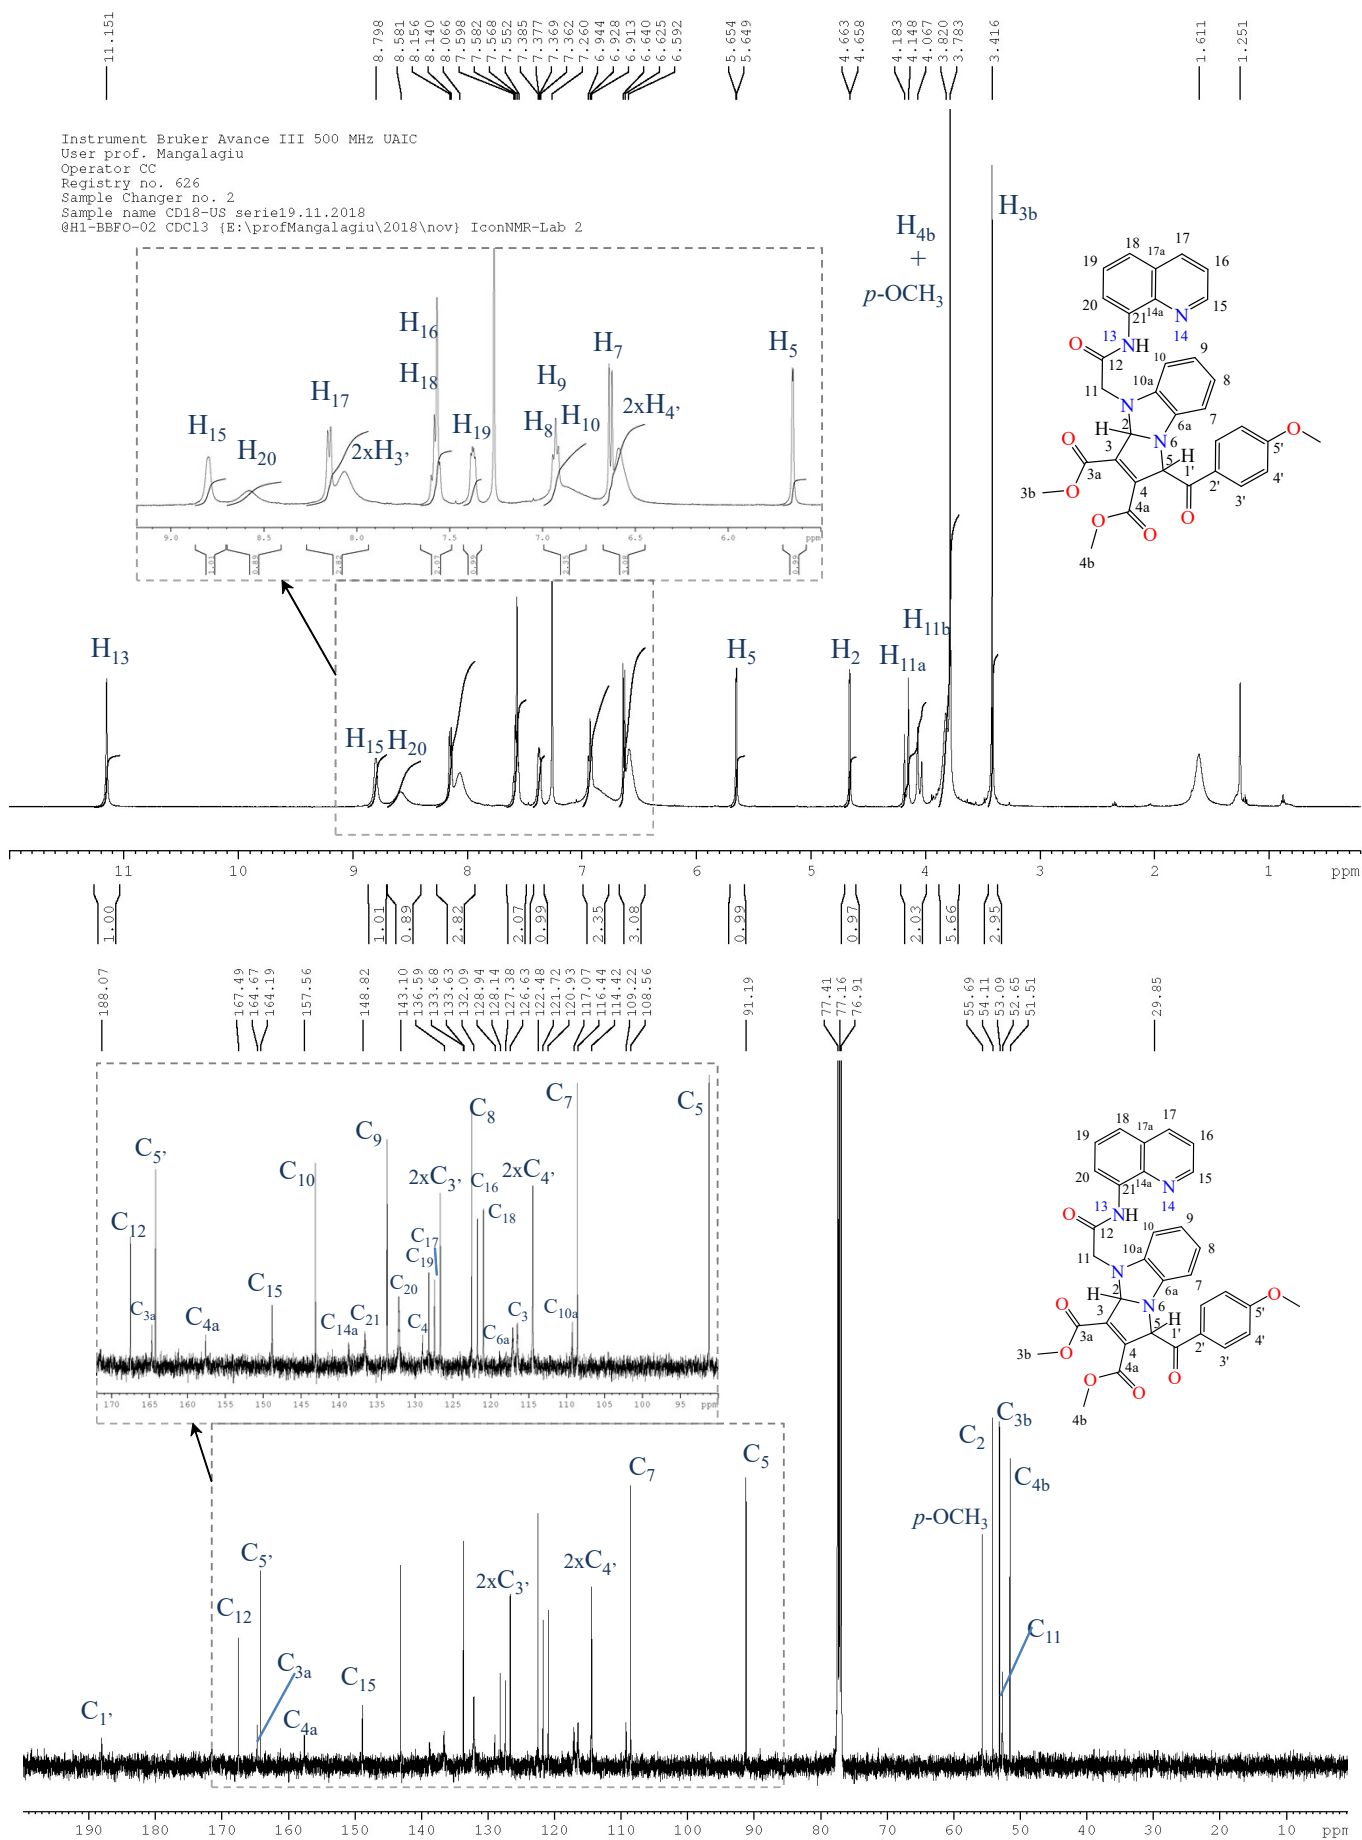

**Figure 3.**  $^1\text{H-NMR}$  and  $^{13}\text{C}\{^1\text{H}\}\text{-NMR}$  Spectra for compound **5i**.

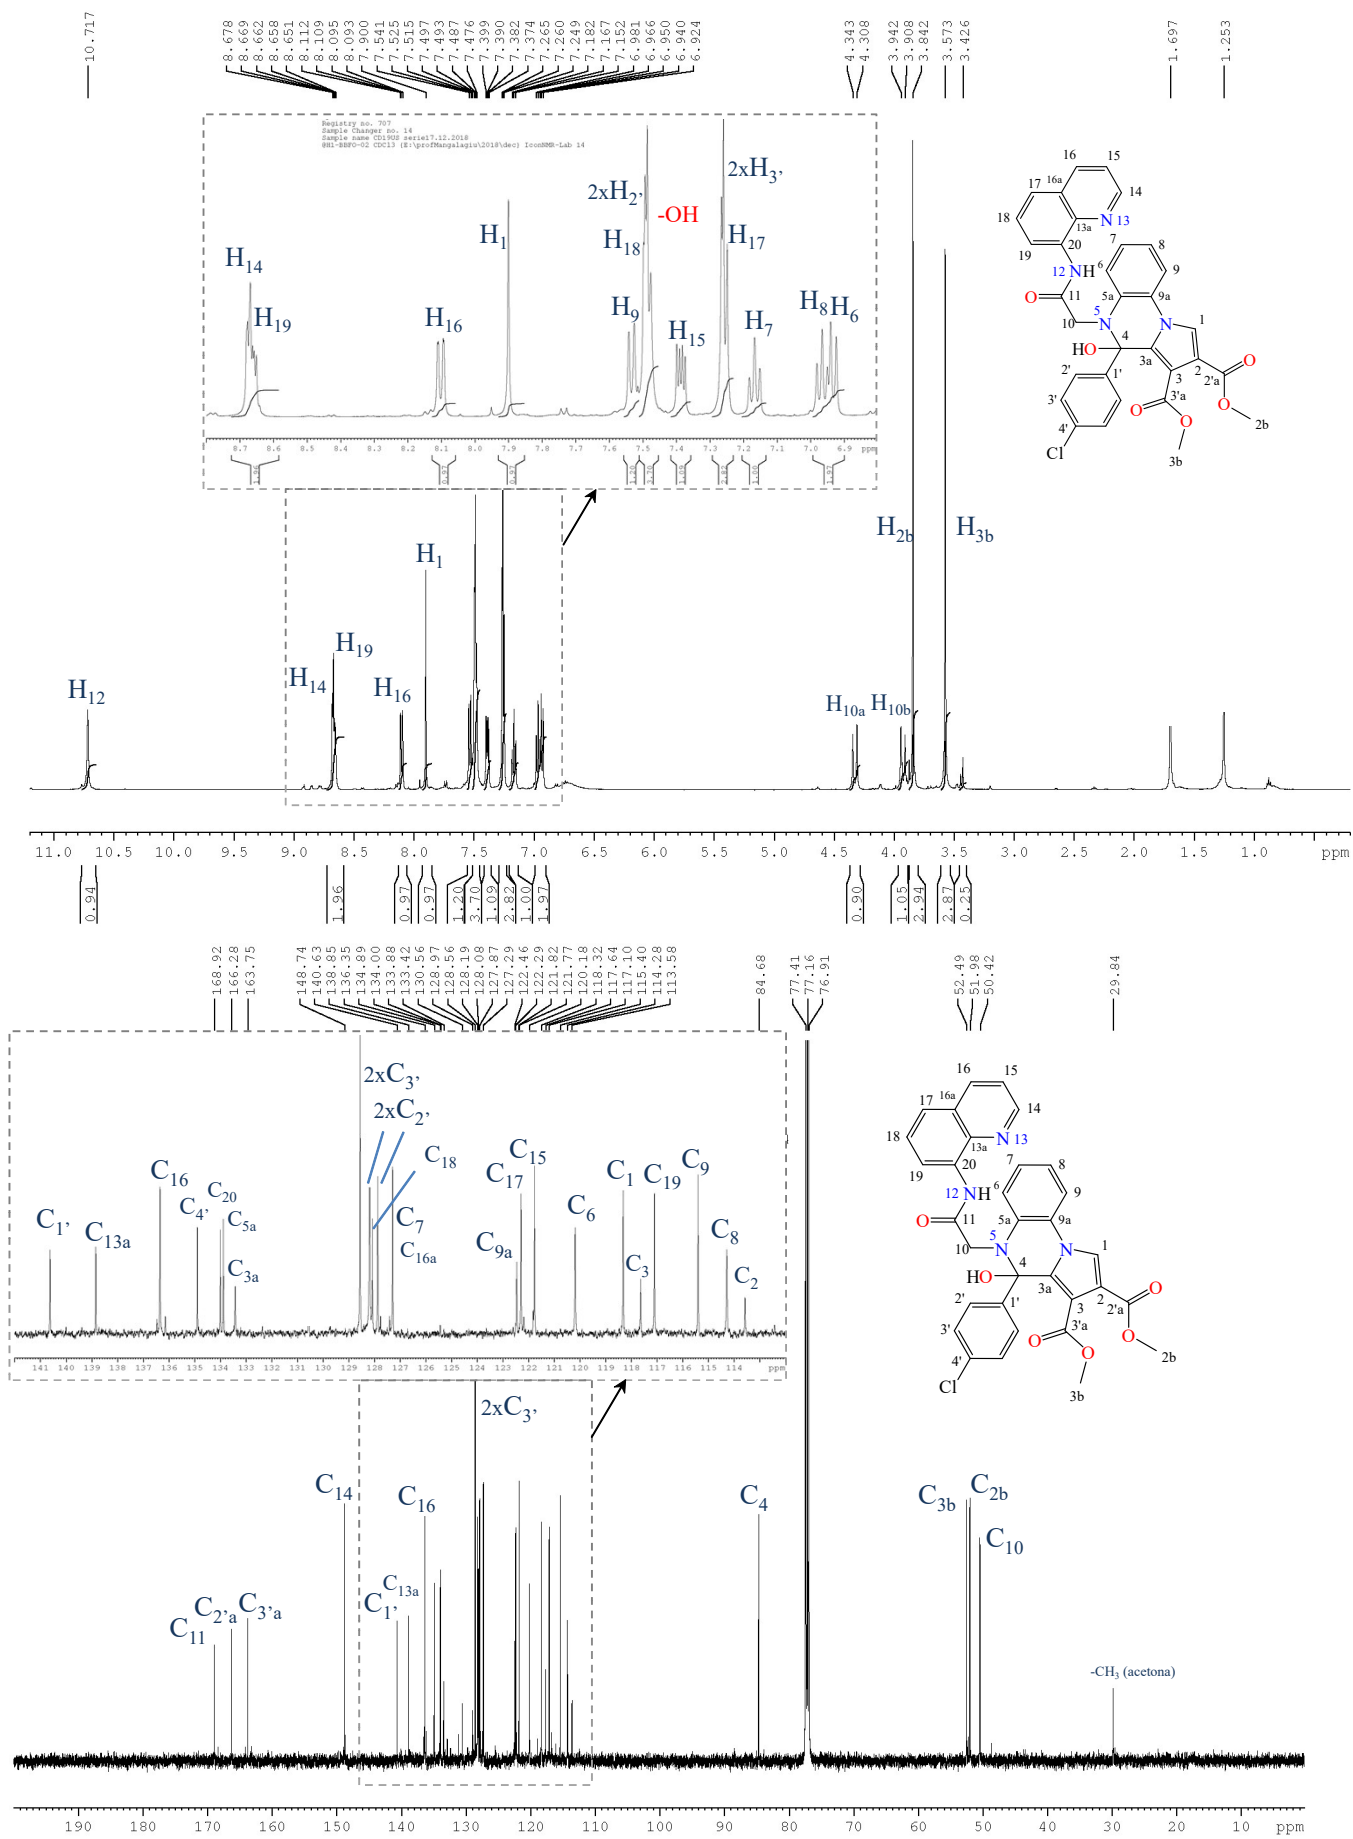

**Figure 4.** <sup>1</sup>H-NMR and <sup>13</sup>C{<sup>1</sup>H}-NMR Spectra for compound 7b.

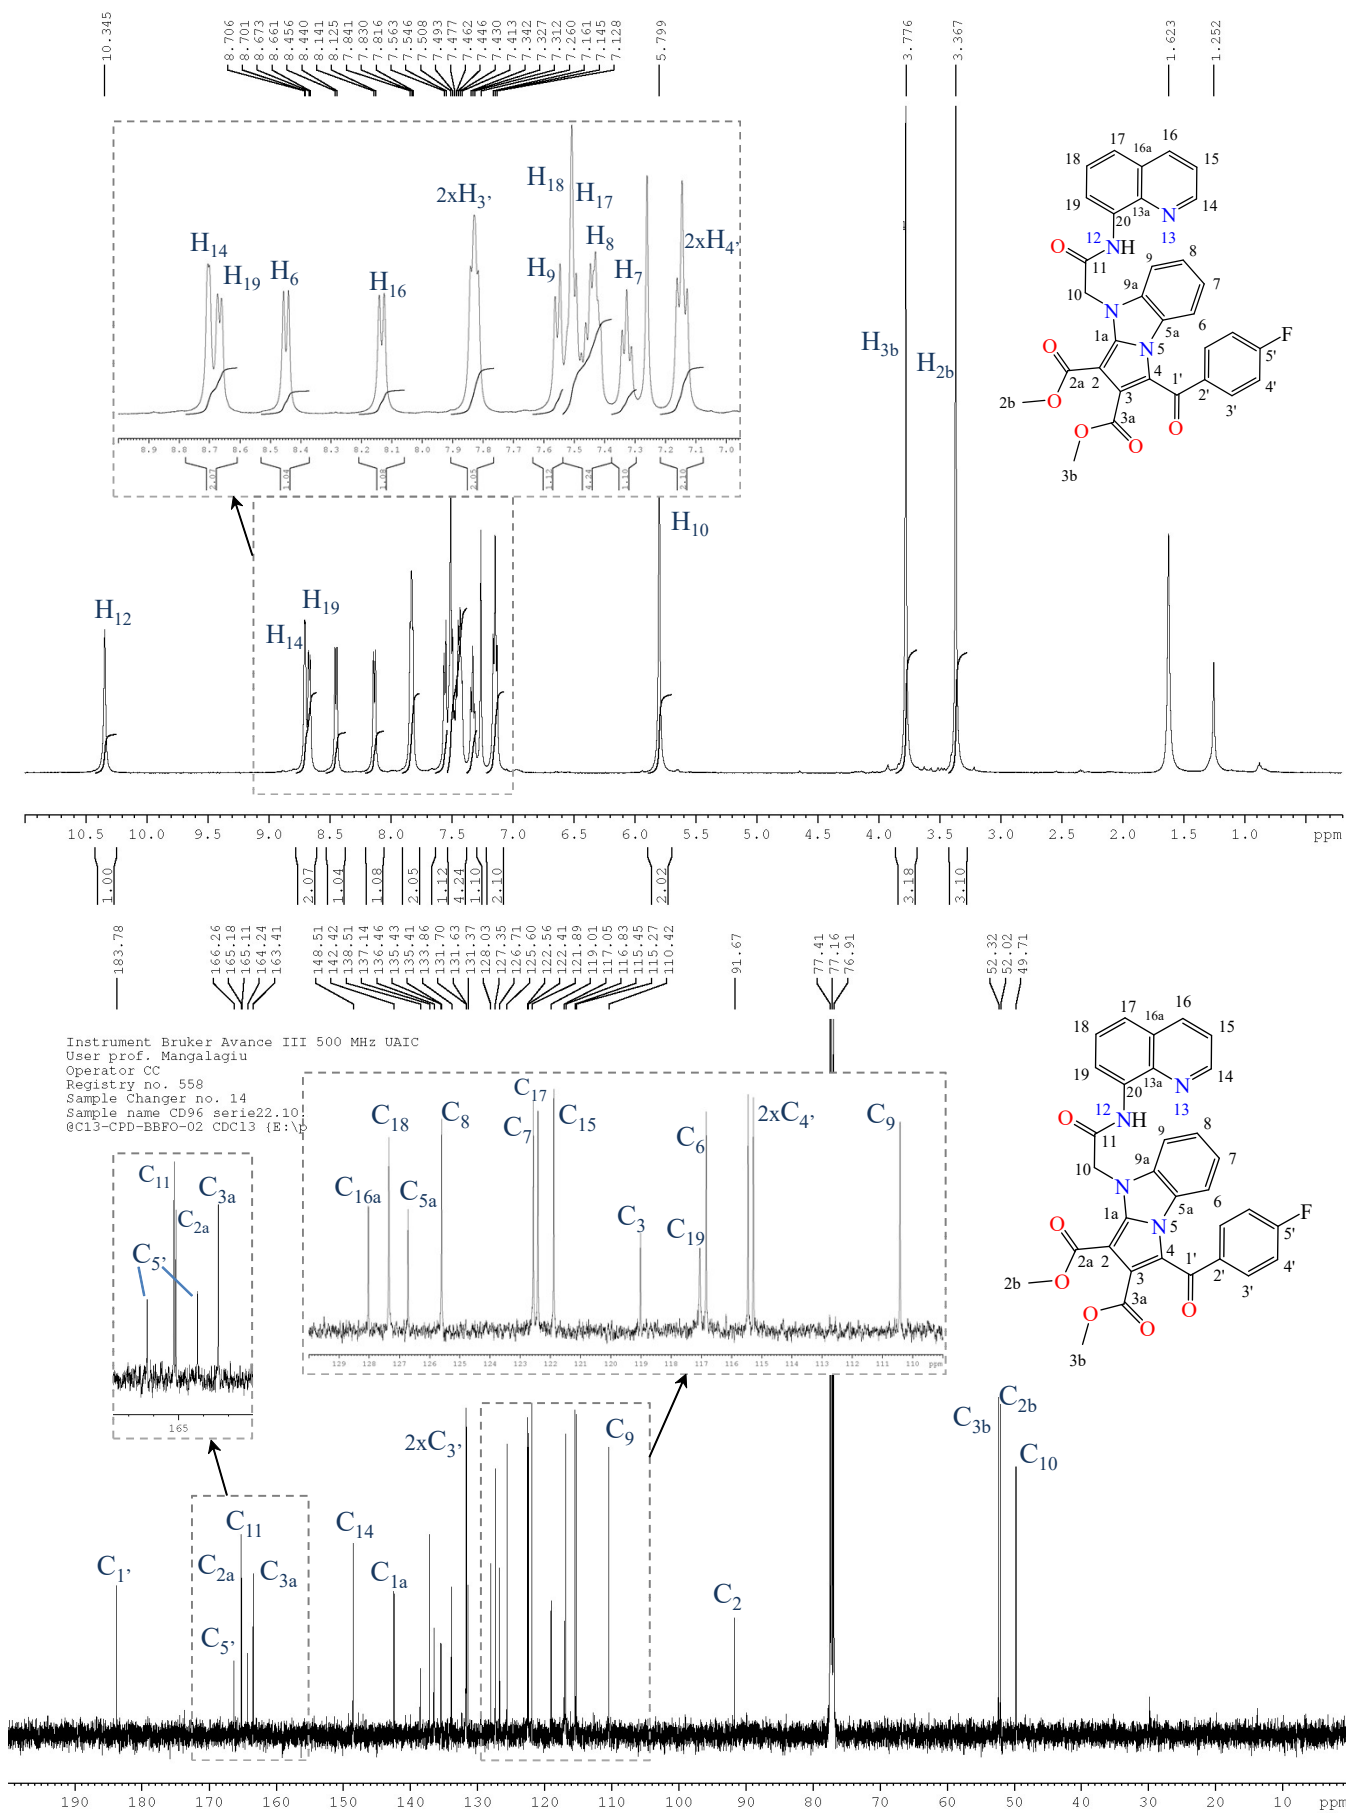

**Figure 5.**  $^1\text{H}$ -NMR and  $^{13}\text{C}\{^1\text{H}\}$ -NMR Spectra for compound **6e**.
